# Supplementary material
Source: HighWire-hosted journal article supplement (https://www.cmajopen.ca/highwire/filestream/85670/field_highwire_adjunct_files/7/2020-0236_original_submission.pdf)
Supplement: 2020-0236_original_submission.pdf [file 2020-0236_original_submission.pdf]

Cherak et al., (2020) Manuscript

# Holistic Wellness Interventions for Canadian Learners in Health Professions: A Scoping Review

Stephana J. Cherak, MSc PhD Candidate<sup>1,2</sup>; Krista Wollny, RN MN PhD Candidate<sup>1,3</sup>;  
Mungunzul Amarbayan, BSc MPH<sup>2,3</sup>; Diane L. Lorenzetti, PhD<sup>1,4</sup>; Aliya Kassam, MSc PhD<sup>1</sup>

<sup>1</sup>Department of Community Health Sciences, Cumming School of Medicine, University of  
Calgary, Calgary, AB, Canada

<sup>2</sup>Department of Critical Care Medicine, Cumming School of Medicine, University of Calgary,  
Calgary, AB, Canada

<sup>3</sup>Faculty of Nursing, University of Calgary, Calgary, Calgary, AB, Canada

<sup>4</sup>School of Public Policy, University of Calgary, Calgary, Calgary, AB, Canada

<sup>5</sup>Health Sciences Library, University of Calgary, Calgary, AB, Canada

1 Cherak et al., (2020) Manuscript

2  
3 **Author Contributions.** Ms. Cherak and Dr. Kassam had full access to all of the data in the study  
4  
5 and take full responsibility for the integrity of the data and the accuracy of the data analysis.  
6

7 *Concept and design:* Cherak, Kassam

8 *Acquisition, analysis, or interpretation of data:* Cherak, Wollny, Amarbayan, Lorenzetti, Kassam

9 *Drafting of the manuscript:* Cherak, Kassam

10 *Critical revision of the manuscript for important intellectual content:* Cherak, Wollny,  
11 Amarbayan, Lorenzetti, Kassam

12 *Obtained funding:* Kassam

13 *Administrative, technical, or material support:* Cherak, Kassam

14 *Supervision:* Kassam  
15  
16  
17  
18

19 **S. Cherak** is a PhD candidate, Department of Community Health Sciences, Cumming School of  
20  
21 Medicine, University of Calgary, Calgary, Alberta, Canada.  
22

23 **K. Wollny** is a PhD candidate, Department of Community Health Sciences, Cumming School of  
24  
25 Medicine, Instructor, Faculty of Nursing, University of Calgary, Calgary, Alberta, Canada.  
26  
27

28 **M. Amarbayan** is a MSc student, School of Public Policy, University of Calgary, Calgary,  
29  
30 Alberta, Canada.  
31

32 **D. Lorenzetti** is director, Health Sciences Library, adjunct assistant professor, Department of  
33  
34 Community Health Sciences, Cumming School of Medicine, University of Calgary, Calgary,  
35  
36 Alberta, Canada.  
37  
38

39 **A. Kassam** is assistant professor, Department of Community Health Sciences, Cumming School  
40  
41 of Medicine, University of Calgary, Calgary, Alberta, Canada.  
42  
43  
44  
45

46 Correspondence should be addressed to:

47  
48  
49 Stephana J. Cherak, Department of Community Health Sciences, Cumming School of Medicine,  
50  
51 University of Calgary, 3330 Hospital Drive NW, Calgary, AB T2N 4N1, Canada  
52

53  
54 E-mail: [sjcherak@ucalgary.ca](mailto:sjcherak@ucalgary.ca)  
55  
56  
57  
58  
59  
60

## **Abstract**

### **Introduction**

Concerns exist about effect of medical education on learner well-being and it is unknown if existing medical schools' interventions incorporate holistic frameworks for learner wellness. The purpose of this scoping review was to explore the breadth and depth of wellness interventions for medical learners [in health professions] to address concerns about effect of medical education on learner well-being.

### **Methods**

The authors systematically searched MEDLINE, EMBASE, CINAHL and APA PsycINFO from database inception through March 11, 2020. Any studies that reported on outcomes of interventions implemented in Canadian medical schools to promote well-being among students in (non-medical) health sciences and medical education programs were included. Authors extracted information on learner demographics, study design, interventions and outcomes assessed.

### **Results**

From 1753 studies, 65 interventions were included (N=10202 learners). Roughly half the studies were conducted with medical students (n=34). Two studies included undergraduate non-medical, health sciences students; no study assessed wellness interventions on graduate students.

Intellectual wellness (n=51) was most commonly targeted, followed by occupational (n=32) and social wellneses (n=17). Of 50 studies that assessed statistical significance, 36 (72%) reported statistically significant positive effects. Overall, 58 of 65 studies (89%) reported positive outcomes among medical students and residents in Canadian academic medicine settings.

### **Discussion**

Cherak et al., (2020) Manuscript

The observed heterogeneity in wellness interventions suggests undergraduate and postgraduate medical education training programs in Canada are not consistently implementing wellness interventions for enhanced learning environments and improved learner well-being. These findings highlight need for innovative wellness tools that facilitate holistic learner wellness.

## Keywords

Medical Learners; Wellness; Interventions; Scoping Review

Confidential

1 Cherak et al., (2020) Manuscript

2  
3 Over the last century, medical education has shifted from informative education for  
4 trained expertise,<sup>1</sup> to formative education that fashioned professionals,<sup>2</sup> to transformative  
5 scholarship “about developing leadership attributes; its purpose to produce an enlightened change  
6 agent.”<sup>3</sup> Medical schools aim to cultivate competent, kind and professional physicians.<sup>4,5</sup>

7  
8  
9  
10  
11  
12 A key component of academic medicine settings is its effect on learner well-being.<sup>6</sup>  
13  
14 Reported well-being of matriculating medical trainees decreases during undergraduate medical  
15 education;<sup>7</sup> medical trainees are likely to experience reduced well-being and have increased  
16 prevalence of burnout into postgraduate medical education.<sup>8,9</sup> Concerns exist about the effect of  
17 medical education on learner well-being<sup>10-15</sup> and it is unknown if existing wellness interventions  
18 incorporate holistic frameworks for learner wellness (i.e., frameworks comprehensive of social,  
19 mental, physical, intellectual and occupational wellness domains).<sup>16</sup> Enhancing the positive  
20 impact of wellness interventions on the systems that influence wellness for all is likely just as  
21 important as targeting individuals that make up learning communities in medical school.<sup>17</sup>

22  
23  
24  
25  
26  
27  
28  
29  
30  
31  
32  
33 The Wellness Subcommittee of the Royal College of Physicians and Surgeons of  
34 Canada’s vision for improving medical education is to “review and formulate program support  
35 systems; address stress-related issues both proactively and reactively; and ensure wellness topics  
36 are included in the academic half-day curriculum.”<sup>18</sup> To provide evidence-based support for this  
37 vision, we conducted a scoping review of the literature with the aim to describe current wellness  
38 interventions, characterize how educators assess wellness interventions in their programs, collate  
39 domains of wellness with established evidence for successful wellness interventions, and identify  
40 opportunities for future research and training for holistic learner well-being. Our question of  
41 research was: To what extent do existing wellness interventions facilitate well-being across five  
42 recognized holistic domains of wellness (social, mental, physical, intellectual, occupational  
43 [hereafter, wellness domains]) considered at the individual, program and system levels, for  
44  
45  
46  
47  
48  
49  
50  
51  
52  
53  
54  
55  
56  
57  
58  
59  
60

Cherak et al., (2020) Manuscript

1  
2  
3 undergraduate non-medical students, graduate science students, undergraduate medical students  
4  
5 and resident physicians in Canadian academic medical settings? We provide our guiding  
6  
7 framework developed for this review in Supplemental Table 1.  
8  
9

## 10 **Methods**

11  
12  
13 We conducted this scoping review as per the Arksey-O'Malley 5-stage scoping review  
14  
15 method<sup>19</sup> and the Joanna Briggs Institute Scoping Review Methods Manual.<sup>20</sup> We used the  
16  
17 Preferred Reporting Items for Systematic Reviews and Meta-analysis Protocols (PRISMA-P)  
18  
19 guideline to develop the protocol.<sup>21</sup> We adhered to the PRISMA-ScR Extension for Scoping  
20  
21 Reviews<sup>22</sup> to report findings (Supplemental Table 2).  
22  
23

### 24 **Populations, settings, and study designs**

25  
26  
27 Our inclusion criteria were as follows: (1) primary quantitative or qualitative research; (2)  
28  
29 reporting on wellness interventions targets to at least one wellness domain; (3) conducted with  
30  
31 Canadian undergraduate medical students, resident physicians, undergraduate non-medical  
32  
33 students or graduate science students in a program housed within a medical school; and (4) in any  
34  
35 language or publication year. We excluded studies if they were not primary research (e.g.,  
36  
37 reviews or editorials), did not report on an intervention aimed to improve wellness of a Canadian  
38  
39 learner, or were not situated at a medical school. For the purposes of this review, we defined: (1)  
40  
41 a learner (i.e., undergraduate medical student, postgraduate medical student [resident physician]  
42  
43 undergraduate non-medical [health sciences] student, graduate science [MSc or PhD] student) as  
44  
45 an individual registered in an academic institution whose program pertains to research or  
46  
47 treatment of diseases and injuries and/or relating to medicine<sup>23</sup>; and (2) a Canadian medical  
48  
49 school as all medical schools in Canada, including those with Dentistry and other healthcare  
50  
51 professions within the medical school (e.g., Western Schulich School of Medicine and Dentistry).  
52  
53  
54  
55  
56  
57  
58  
59  
60

Cherak et al., (2020) Manuscript

## Data sources and searches

We conducted comprehensive literature searches in MEDLINE, EMBASE, APA PsycINFO, and CINAHL. Our search strategies for each database were developed with an experienced Medical Librarian (D.L.L.) and revised after reviewing preliminary search results. Our search strategies combined synonyms and subject headings from three concepts: (1) Canadian learner in an academic medicine setting; (2) wellness domains; and (3) wellness interventions. We also searched the Cochrane Database of Systematic Reviews to identify review articles related to the research question and we screened their reference lists to identify additional potential studies missed in the search. We searched all databases from inception to March 11, 2020 and updated the search on July 11, 2020. We then reviewed reference lists of included papers to identify potential studies missed in the search. We did not apply language or date limits. We provide the complete MEDLINE search strategy in Supplemental Table 2.

## Study selection

After a subset of the study team (S.C., K.W., M.A.) achieved 100% agreement on a pilot-test of 50 random studies, we reviewed all titles and abstracts independently in duplicate (S.C., K.W., M.A.). We progressed any study selected at this stage to full-text review. We then reviewed the full-text of all articles independently in duplicate (S.C., K.W., M.A.); we included articles in the final review if both reviewers at this stage agreed on inclusion. We resolved disagreements by the involvement of a fourth reviewer (A.K.).

## Data abstraction

Independently and in duplicate, we (S.C., K.A., M.A., A.K.) abstracted data for each included study using a data collection sheet developed and piloted by the review team. We resolved discrepancies through discussion. We collected information on document characteristics (e.g., year of publication, geographic location), study characteristics (e.g., medical school, time

Cherak et al., (2020) Manuscript

1  
2  
3 frame of data collection), learner group, wellness intervention domain (i.e., social, mental,  
4  
5 physical, intellectual, occupational), level of wellness intervention (i.e., individual, program or  
6  
7 system), outcomes of wellness interventions (e.g., measures, themes, theories), statistical  
8  
9 significance (e.g., significant, not significant, not assessed), limitations (as reported), and authors'  
10  
11 conclusions (as published). We documented studies that examined wellness as one component of  
12  
13 a multi-component intervention to assess outcomes related to wellness only (e.g., where  
14  
15 knowledge from a clinical education intervention contributed to satisfaction for intellectual  
16  
17 wellness, not just application of procedural or clinical skills).  
18  
19  
20

### 21 **Data synthesis and analysis**

22  
23  
24 We synthesized findings descriptively to map different areas of the literature as outlined  
25  
26 in the research question. We categorized wellness interventions into five domains: social (e.g.,  
27  
28 equity, diversity), mental (e.g., mindfulness, emotions), physical (e.g., exercise, nutrition),  
29  
30 intellectual (e.g., learning tools, education) and occupational (e.g., research, resident rotation); we  
31  
32 provide full descriptions and additional examples for wellness domains in Supplemental Table 1.  
33  
34 If applicable, we recorded more than one wellness domain for a single study. We categorized the  
35  
36 level of intervention as individual (i.e., the individual learner), program (i.e., the program the  
37  
38 learner is enrolled in) or system (i.e., the academic institution or system the learner is housed  
39  
40 within) (Supplemental Table 1); we recorded only one level of intervention for each study. We  
41  
42 classified outcomes according to wellness domain targeted as stated in the study main objective.  
43  
44 We classified studies as “statistically significant” if  $p < 0.05$  and “not statistically significant” if  
45  
46  $p \geq 0.05$ . We classified studies as “not assessed” if significance was not assessed through statistical  
47  
48 equations. We calculated descriptive statistics using STATA IC 15 (StataCorp. Stata Statistical  
49  
50 Software: Release 15. College Station, TX: StataCorp LLC).  
51  
52  
53  
54  
55  
56  
57  
58  
59  
60



## Results

We screened 4320 unique abstracts, of these, 750 full-text articles were selected for review, 65 of which were included in our synthesis. Of the 685 full-text articles that were excluded, the most common reasons for exclusion were the study did not report on a wellness intervention (n=512/685) or did not include Canadian learners in an academic medicine setting (n=77/685). We achieved 93% agreement (n=4,036/4,320) on title and abstract screening and 98% agreement (n=736/750) on full-text screening. Figure 1 illustrates flow of study inclusion or exclusion and Table 1 provides characteristics for all 65 wellness intervention studies included in our review.

### **Wellness domains and level of intervention for learner populations in academic medicine settings**

The 65 included studies<sup>24-88</sup> were published between 1973 and 2020 and conducted frequently at the University of Toronto (n=16, 25%) or McGill University (n=8, 12%), and with undergraduate (n=34, 52%) or postgraduate medical education students (n=31, 48%). Two studies included both medical students and residents, another two studies targeted undergraduate health sciences students, and no studies included graduate students.

Among the 44 studies that reported implementation year the median was 2010 (range: 1971-2018). Median intervention duration reported from 47 studies was 3 months (range: 1 hour-48 months). Many studies (n=52, 80%) were uncontrolled trials of which half were conducted with undergraduate medical students (n=26). We included 16 qualitative studies and most (n=9) were conducted with undergraduate medical students. Residents were most commonly family medicine physicians (n=6) and pediatrics broadly (n=6)—which could include pediatric subspecialties (n=2) but the generalist practice was more broadly defined (n=4).

Cherak et al., (2020) Manuscript

1  
2  
3 Most studies examined wellness interventions targeted to intellectual (n=51, 78%) or  
4 occupational (n=32, 49%) wellness domains; twenty three of which (35%) targeted both domains  
5 within a single intervention. Among the 19 interventions implemented for individual learners, the  
6 majority (n=14) were for medical students, while interventions at the program level (n=27) were  
7 primarily for resident physicians (n=17). Medical students and residents were represented  
8 similarly among systems level interventions (undergraduate, n=9; postgraduate, n=10). We found  
9 that both (n=2) wellness interventions targeted to undergraduate health sciences students were  
10 implemented at the system level.  
11  
12  
13  
14  
15  
16  
17  
18  
19  
20

### 21 **Outcomes and measures for wellness domains**

22  
23 Among the 17 studies which aimed to improve social wellness, 10 studies assessed  
24 learner satisfaction with the intervention (Table 2). Other outcome measures for social wellness  
25 included learner agreement that the intervention addressed wellness (n=7) and learner perceptions  
26 (n=6). Four of the 6 mental wellness interventions assessed learner experiences through open-  
27 ended survey questions or semi-structured interviews. The single study which assessed mental  
28 health (i.e., anxiety) symptoms used the State-Trait Anxiety Inventory (STAI).<sup>89</sup> Compliance was  
29 assessed for the single intervention on physical wellness; specifically, compliance rates for  
30 immunizations. Twenty three intellectual wellness and 14 occupational wellness interventions  
31 assessed learner knowledge through standardized knowledge assessment tools (e.g., the Quality  
32 Improvement Knowledge Application Tool - Revised [QIKAT-R]<sup>90</sup>) with self-assessment tools  
33 specific to knowledge delivered (i.e., knowledge assessments tapped in to subjective wellness  
34 associated with knowledge gained). Other frequent outcomes among intellectual and occupational  
35 wellness interventions were agreement regarding that the intervention addressed wellness (n=12)  
36 and satisfaction (n=8).  
37  
38  
39  
40  
41  
42  
43  
44  
45  
46  
47  
48  
49  
50  
51  
52  
53  
54  
55

### 56 **Qualitative wellness intervention studies**

We included sixteen studies that qualitatively explored wellness among learners through interventional trials, and most (n=12) focused particularly on promoting and understanding intellectual wellness in medical education. Summary of findings from qualitative studies are provided in Table 3. Though all qualitative studies reported favourable outcomes associated with the interventions, three studies concluded that more formal audit and additional research is needed,<sup>31,66,74</sup> while two studies uncovered shortcomings in medical education related to postgraduate education content<sup>81</sup> and undergraduate medical education leadership.<sup>30</sup> The key findings among qualitative studies were that aspects of wellness among learners form a multi-dimensional construct. This construct covered four key domains: 1) genuine sense of personal fulfillment and gratification in medical education; 2) grounded understanding of requirements for medical education programs; 3) enhanced peer cohesion and functionality; and 4) promoting cognitive flexibility to strengthen knowledge for diverse perspectives. Three conditions were identified as both predicting enhanced wellness and promoting better well-being. These were: 1) effective coping and emotional regulation through individual strategies; 2) individual and program affirmation of the role of being a learner in a medical school; and 3) systems that favor attributing meaning to being a learner. All qualitative studies included in our review provide insight into catalyzing the paradigm shift from reducing manifestations of learner distress to optimizing wellness interventions through proactively addressing underlying sources of learner distress and cultivating a holistic sense of well-being.

### **Evaluation of wellness interventions**

Statistical evaluation of wellness interventions was explored extensively (n=41, 63%)—namely, evaluating perceptions of wellness pre- and post-intervention, satisfaction with the intervention, and determining attitudes and agreement regarding use of interventions to enhance at least one wellness domain. In Table 4 we provide summarized findings on the statistical

Cherak et al., (2020) Manuscript

1  
2  
3 evaluation of wellness interventions regarding wellness domains about learner population and  
4  
5 level of intervention. Among the 17 interventions to improve social wellness, most studies (n=6)  
6  
7 with medical students showed statistically significant positive results, while some studies (n=3)  
8  
9 with resident physicians showed statistically significant positive results for social wellness.  
10  
11 Studies on mental wellness interventions (all six in resident physicians) showed mixed results;  
12  
13 half (n=3) of these studies did not assess for statistical significance. The single intervention on  
14  
15 enhancing physical wellness in resident physicians showed statistically significant positive  
16  
17 results. Among the 51 intellectual wellness interventions, most showed statistically significant  
18  
19 positive effects for both medical students (n=17) and resident physicians (n=13). While  
20  
21 statistically significant positive results for intellectual wellness were represented comparably  
22  
23 across intervention levels in undergraduate medical students (individual, n=6; program, n=6;  
24  
25 system, n=5), statistically improved intellectual wellness was primarily (n=11) at the program  
26  
27 level for resident physicians. Most of the 32 occupational wellness interventions showed  
28  
29 statistically significant positive results for medical students (n=12) and resident physicians (n=8)  
30  
31 implemented primarily at the individual level for medical students (n=6) and at the program level  
32  
33 for resident physicians (n=4).  
34  
35  
36  
37  
38  
39

## 40 **Discussion**

41  
42  
43 We synthesized diverse literature to inform medical educators of key components for  
44  
45 rigorous, evidence-based wellness interventions to improve learner well-being. In sum, the results  
46  
47 of our review indicate that social, intellectual and occupational wellness interventions for  
48  
49 undergraduate medical education students improve wellness at the individual learner, medical  
50  
51 program or medical education system levels, while intellectual and occupational wellness  
52  
53 interventions for resident physicians improve wellness at the program level. Studies reporting  
54  
55  
56  
57  
58  
59  
60

Cherak et al., (2020) Manuscript

interventions targeting mental and physical wellness among learners in a Canadian medical school setting are scarce.

The observed heterogeneity in wellness interventions implies medical education systems and programs may not be consistently implementing wellness interventions for enhanced medical education learning environments or evaluating their impact on learner wellbeing. Only a small subset of studies contained empirically evaluated interventions, yet few used valid and reliable outcome measures. Despite these limitations in the evidence, below we propose a number of key findings from our review that may be relevant for Canadian medical schools and other medical schools more broadly. We suggest lines of inquiry for innovation of medical education for a holistic approach to learner well-being.

### **Wellness of Canadian learners in academic medicine settings**

#### *Social wellness*

Mentorship is an interactive process to encourage learning and development grounded in social learning principles.<sup>91,92</sup> While mentorship has been used extensively in the setting of United States academic medical schools,<sup>6</sup> our review indicates that formal faculty advisor/mentor programs as a method to promote social wellness may be understudied (reported by two studies only) and underutilized in Canadian academic medical schools. Formal mentorship programs based in small groups and linked with curricular and/or professional content can be used to offer academic career guidance to graduate science researchers,<sup>93,94</sup> or to develop clinical skills among medical students<sup>95</sup> and resident physicians.<sup>96</sup> Mentorship programs to facilitate social wellness often report high satisfaction,<sup>97,98</sup> career promotion,<sup>99</sup> improved clinical performance<sup>100</sup> and patient safety.<sup>101,102</sup> While mentorship is ubiquitous in medical education, our review shows that academic medical schools do not explicitly incorporate mentorship in their wellness programs. We encourage Canadian medical schools to conduct high-quality research on mentorship

Cherak et al., (2020) Manuscript

1  
2  
3 interventions for improved social wellness of learners. We suggest such evidence will enable the  
4  
5 greatest exploitation of knowledge to promote the transfer of mentorship programs from medical  
6  
7 schools, one program, one individual, to the next. Exceptional academic mentors are critical to  
8  
9 demonstrate the importance of inclusion, diversity and professionalism—key components of  
10  
11 social wellness—in medical education.<sup>103</sup>  
12  
13

#### 14 *Mental wellness*

15  
16  
17 Barriers to learners' mental health treatment are common<sup>104,105</sup> and must be considered for  
18  
19 effective mental wellness interventions.<sup>106,107</sup> Increasing access to and reducing the stigma of  
20  
21 mental health interventions for learners was not frequently considered among our included  
22  
23 studies. Learners with mental health illnesses and disorders can go undiagnosed and  
24  
25 undertreated.<sup>108</sup> In 2019, Wilkes and colleagues surveyed 69 undergraduate medical students and  
26  
27 reported that while 83% of students considered medical education a source of stress and 70% met  
28  
29 criterium for exhaustion, only 36% of students reported seeing a mental health professional to  
30  
31 address mental health concerns.<sup>109</sup> These findings, in line with our review, highlight a need for  
32  
33 formal programs focused on mental wellness, inclusive of increasing awareness, reducing stigma  
34  
35 and improving access to mental health services at programmatic and systemic levels. Although  
36  
37 this approach has been associated with lower depression and suicidal ideation rates in the United  
38  
39 States, the effectiveness of this approach in Canadian medical schools is as yet unknown.<sup>110</sup>  
40  
41  
42  
43

44  
45 While the studies included in our review evaluated a diverse set of mental wellness  
46  
47 outcomes, none explored positive adaptations to potential mental health consequences of medical  
48  
49 education. Positive psychological outcomes are as important as negative outcomes<sup>111</sup> given that  
50  
51 positive psychological adaptations evolve to demands of stressful experiences, encapsulated  
52  
53 within psychological resilience.<sup>112,113</sup> Though highly resilient individuals are known to  
54  
55 proactively cultivate positive adaptations,<sup>114,115</sup> it is unknown whether positive psychological  
56  
57  
58  
59  
60

Cherak et al., (2020) Manuscript

adaptations are simply by-products of wellness interventions or whether they can also improve coping behaviors. Future interventions for improved mental wellness should consider mental wellness, as the aggregate of negative and positive mental wellness outcomes.

### *Physical wellness*

Not all wellness domains were equally well represented in the included studies. In contrast to other wellness domains long recognized as integral elements of a physician's well-being (i.e., intellectual and occupational wellness), physical wellness does not have comparable widespread acceptance as an aspect of physician well-being.<sup>116,117</sup> Comprehensive adherence to various dimensions of physical wellness is low among undergraduate medical education students.<sup>118</sup> Holtz and colleagues demonstrated through an online cross-sectional survey of fourth-year University of British Columbia medical students that individuals who perceived exercise counseling to be highly important to clinical practice participated in significant physical activity themselves.<sup>119</sup> In our review, we found a scarcity of physical wellness interventions, suggesting a possible need for the inclusion of physical wellness components in future wellness programs.<sup>120</sup> While it may be hubristic to suggest learner wellness interventions will improve patient outcomes,<sup>121</sup> we contend encouraging physical wellness in medical education should be considered an important part component in the development of competent and professional future physicians.<sup>122</sup>

### *Intellectual wellness*

Overall, we found that wellness interventions identified through this review were designed to promote collectives of individual learners, to encourage a collaborative state of mind rather than peer-to-peer competition. Our finding aligns with the fact that all but two Canadian medical schools have adopted a pass/fail grading system for all years of medical education.<sup>123</sup> A pass/fail system has been demonstrated to improve intellectual well-being,<sup>124</sup> enhancing

Cherak et al., (2020) Manuscript

1  
2  
3 teamwork among learners<sup>125</sup> without negative impact on academic performance.<sup>126</sup> In light of our  
4  
5 findings and in line with seminal studies on this topic,<sup>127,128</sup> we recommend a pass/fail system  
6  
7 with demarcated standards to guide medical education and build the intellectual achievement of  
8  
9 an individual learner independent of the underachievement of another. Pass/fail grading systems  
10  
11 complemented by standards-based evaluations is a vital step along the continuum to recognizing  
12  
13 learners' as professionals, enhancing intellectual wellness, and preparing medical students for life  
14  
15 as enduring learners.  
16  
17

18  
19 With respect to assessment strategies for intellectual wellness interventions, we  
20  
21 commonly found assessments of learner satisfaction, learner self-assessment of [knowledge]  
22  
23 outcomes achievement, and assessments of learner agreement with and perception of the  
24  
25 intervention as impactful to their intellectual well-being. We suggest the most appropriate  
26  
27 outcome measures for a given intellectual wellness intervention should depend on the goals and  
28  
29 objectives of the medical educators. The majority of studies on intellectual wellness, including 4  
30  
31 RCTs, indicated intellectual wellness interventions have higher learner satisfaction and greater  
32  
33 achievement of knowledge-related outcomes when skills are taught in condensed workshops,  
34  
35 ranging from 2 hours<sup>56</sup> to 5 days<sup>38</sup> to 2 weeks.<sup>48</sup> Based on our findings we recommend medical  
36  
37 schools and programs balance benefit from intellectual wellness interventions with learner time  
38  
39 investments to enable adequate learner maintenance for intellectual wellness interventions to  
40  
41 maximize intellectual well-being.  
42  
43  
44  
45

#### 46 *Occupational wellness*

47  
48  
49 Our review indicates that occupational wellness is an increasingly well-researched area of  
50  
51 learner well-being at Canadian medical schools. We found that occupational wellness is  
52  
53 important for all learners, particularly resident trainees.<sup>129</sup> Research presented at the 2018  
54  
55 International Conference on Physician Health in Toronto showed that in comparison to Canadian  
56  
57  
58  
59  
60



Cherak et al., (2020) Manuscript

1  
2  
3 physicians, Canadian residents have 48% increased risk of burnout, 95% increased risk of  
4  
5 depression and 72% increased risk of suicidal thoughts.<sup>130</sup> The view that the residency program  
6  
7 environment plays a predominant role in the occupational wellness of residents is gaining traction  
8  
9 in Canada; at this same physician health conference, medical leaders stressed the need for  
10  
11 universities to make occupational wellness a core competency of medicine through medical  
12  
13 learning redesign.<sup>131</sup> While it may be premature to estimate full effects of this call, in our review  
14  
15 we found many occupational wellness interventions that targeted program and system factors to  
16  
17 address culture, learning and work environments. Our findings highlight the need for more high-  
18  
19 quality occupational wellness interventions, to ensure efficacious interventions are effectively  
20  
21 implemented in a contextually adaptive manner that can respond to the needs of each learner.  
22  
23  
24  
25

### 26 **Lines of inquiry for redesign of holistic learner well-being**

27  
28 This scoping review provides an overview of the breadth and nature of wellness  
29  
30 interventions in Canadian medical education. Our review examined a broad scope of learner  
31  
32 wellness domains, which can be of use to program directors, educators and administrators  
33  
34 working to develop holistic wellness interventions.  
35  
36

37  
38 Despite our comprehensive search and broad inclusion criteria we found no study that  
39  
40 reported on wellness interventions for graduate science education students. Scientific research is  
41  
42 an important element in graduate science education programs and learners conducting scientific  
43  
44 research as a core element of their training program may face unique wellness challenges.<sup>132,133</sup> In  
45  
46 Canada, the integrative MD-PhD program is a popular approach for training physician-  
47  
48 scientists<sup>134</sup> and represents a substantial investment of institutional, federal and societal  
49  
50 resources.<sup>135</sup> As such, we recommend medical schools consider wellness interventions for all  
51  
52 learners conducting scientific medical research to augment their success as future investigators.  
53  
54  
55  
56  
57  
58  
59  
60

1  
2  
3 Our review suggests that the holistic redesign of wellness supports, tools and programs  
4 offered to learners is likely to incorporate many wellness domains. We found that few studies  
5 included process evaluations to assess implementation of interventions (i.e., fidelity, dose or  
6 reach of the intervention) and outcome assessments (i.e., use of wrong or incomplete  
7 measurement tool) over time. Though most studies reported positive improvements in wellness, it  
8 is possible interventions were not reliably delivered as intended or consistently adhered to as  
9 required.<sup>136</sup> Along with others,<sup>6</sup> we suggest future evaluation of wellness interventions study  
10 sequential phases of implementation to determine synergies among wellness domains associated  
11 with improvements in learner well-being.  
12  
13  
14  
15  
16  
17  
18  
19  
20  
21  
22  
23

24 We found that few studies reported using theories of wellness change (e.g., Nussbaum's  
25 human capabilities approach [freedom to attain well-being is partial to people's capabilities—real  
26 opportunities to do and be what they have reason to value]<sup>137</sup>), to inform the selection of  
27 interventions and outcomes. We suggest the wellness trajectories of learners may require  
28 different wellness domains to be targeted by different interventions at different time points. What  
29 works at one stage of medical education may not be helpful at the next stage of training.<sup>138</sup>  
30  
31  
32  
33  
34  
35  
36  
37

38 We acknowledge that from our review it is unclear whether wellness outcomes with  
39 overlapping “symptoms” have differential responses to interventions, or whether the smaller  
40 number of trials examining social, mental and physical wellness explain our observations. It is  
41 also possible that some neutral or negative outcomes represent unaccounted for illnesses in the  
42 learner that may not be responsive to interventions. For these learners, wellness interventions  
43 may have important adverse effects that need to be carefully weighed against any potential  
44 benefit.<sup>139</sup> We assert there is no magic bullet to improve learner well-being however a holistic  
45 approach targeting interventions at the levels of individual learners, programs and the overall  
46 system may help to cultivate an enduring culture of wellness in academic medicine.  
47  
48  
49  
50  
51  
52  
53  
54  
55  
56  
57  
58  
59  
60

## Limitations

The results of this review need to be interpreted within the context of its limitations. Primarily, we did not search the grey literature, including ongoing clinical trial registries. The inclusion of conference abstracts and other forms of grey literature may have uncovered additional evidence of relevance to this review. Second, the scope of our review was restricted to studies evaluating the effect of wellness interventions on five medical learner wellness domains, although there are other domains of the learning environment that deserve attention in a holistic redesign of wellness support, tools and programs offered to learners such as spirituality.<sup>140</sup> Third, we found that authors nearly exclusively reported successes of their wellness interventions—and few failures—which suggests a possible publication bias in favour of positive studies. Fourth, given our inclusive wellness framework and the multifaceted nature of wellness interventions, it was not possible to determine the specific components of individual wellness interventions associated with more favourable learner well-being. Fifth, lack of a universal definition of learner wellness added complexity to the study selection process. However, our broad inclusion criteria allowed us to produce a more comprehensive summary of literature on this topic. Finally, we restricted our review to Canadian medical schools, however different countries with different medical education systems may have differing cultural values such as child caregiving responsibilities and social support networks which may influence the learner experience.<sup>141</sup>

## Conclusions

High-quality medical training can ultimately translate to high-quality care.<sup>142,143</sup> Wellness interventions in academic medicine settings are highly variable, which implies medical education systems and programs may not consistently be implementing wellness interventions to enhance medical education learning environments and improve learner well-being. The findings from this

Cherak et al., (2020) Manuscript

1  
2  
3 review highlight that medical education research on learner wellness will benefit from studies  
4  
5 with rigorous design, appropriate comparators, and objective data collection. High-quality  
6  
7 medical education research on wellness innovation across the spectrum of health sciences and  
8  
9 health professions training is needed to ensure and sustain holistic learner well-being.  
10  
11  
12  
13  
14  
15  
16  
17  
18  
19  
20  
21  
22  
23  
24  
25  
26  
27  
28  
29  
30  
31  
32  
33  
34  
35  
36  
37  
38  
39  
40  
41  
42  
43  
44  
45  
46  
47  
48  
49  
50  
51  
52  
53  
54  
55  
56  
57  
58  
59  
60

Confidential

1 Cherak et al., (2020) Manuscript  
2

### 3 **Structured Disclosures** 4

5  
6 **Acknowledgments:** None  
7

8 **Funding/Support:** This study was funded by the Office of Postgraduate Medical Education and  
9 supported by the Office of the Senior Associate Dean of Education at the Cumming School of  
10  
11  
12  
13  
14  
15  
16  
17  
18  
19  
20  
21  
22  
23  
24  
25  
26  
27  
28  
29  
30  
31  
32  
33  
34  
35  
36  
37  
38  
39  
40  
41  
42  
43  
44  
45  
46  
47  
48  
49  
50  
51  
52  
53  
54  
55  
56  
57  
58  
59  
60  
Medicine.

15 **Other disclosures:** None  
16

17 **Ethical approval:** Not applicable  
18

19 **Disclaimers:** None  
20

21 **Previous presentations:** None  
22  
23  
24  
25  
26  
27  
28  
29  
30  
31  
32  
33  
34  
35  
36  
37  
38  
39  
40  
41  
42  
43  
44  
45  
46  
47  
48  
49  
50  
51  
52  
53  
54  
55  
56  
57  
58  
59  
60

Confidential

## References

1. Flexner S, Lewis PA. Experimental Epidemic Poliomyelitis in Monkeys. *J Exp Med*. 1910;12:227-55.
2. Cooke M, Irby DM, Sullivan W, Ludmerer KM. American medical education 100 years after the Flexner report. *N Engl J Med*. 2006;355:1339-44.
3. Frenk J, Chen L, Bhutta ZA, et al. Health professionals for a new century: transforming education to strengthen health systems in an interdependent world. *Lancet*. 2010;376:1923-58.
4. Norman GR, Schmidt HG. The psychological basis of problem-based learning: a review of the evidence. *Acad Med*. 1992;67:557-65.
5. Dezee KJ, Artino AR, Elnicki DM, Hemmer PA, Durning SJ. Medical education in the United States of America. *Med Teach*. 2012;34:521-5.
6. Wasson LT, Cusmano A, Meli L, et al. Association Between Learning Environment Interventions and Medical Student Well-being: A Systematic Review. *JAMA*. 2016;316:2237-52.
7. Brazeau CM, Shanafelt T, Durning SJ, et al. Distress among matriculating medical students relative to the general population. *Acad Med*. 2014;89:1520-5.
8. Dyrbye LN, West CP, Satele D, et al. Burnout among U.S. medical students, residents, and early career physicians relative to the general U.S. population. *Acad Med*. 2014;89:443-51.
9. Roberts DL, Shanafelt TD, Dyrbye LN, West CP. A national comparison of burnout and work-life balance among internal medicine hospitalists and outpatient general internists. *J Hosp Med*. 2014;9:176-81.

Cherak et al., (2020) Manuscript

10. Jennings ML, Slavin SJ. Resident Wellness Matters: Optimizing Resident Education and Wellness Through the Learning Environment. *Academic medicine : journal of the Association of American Medical Colleges*. 2015;90:1246-50.
11. Ripp JA, Privitera MR, West CP, et al. Well-Being in Graduate Medical Education: A Call for Action. *Academic medicine : journal of the Association of American Medical Colleges*. 2017;92:914-7.
12. Slavin SJ, Chibnall JT. Finding the Why, Changing the How: Improving the Mental Health of Medical Students, Residents, and Physicians. *Academic medicine : journal of the Association of American Medical Colleges*. 2016;91:1194-6.
13. Tawfik DS, Profit J, Morgenthaler TI, et al. Physician Burnout, Well-being, and Work Unit Safety Grades in Relationship to Reported Medical Errors. *Mayo Clinic proceedings*. 2018;93:1571-80.
14. Vogel L. Physician health charter calls on health systems, organizations to share responsibility for burnout. *CMAJ : Canadian Medical Association journal = journal de l'Association medicale canadienne*. 2018;190:E812-e3.
15. Vogel L. Medical education needs reform to improve student well-being and reduce burnout, say experts. *Canadian Medical Association Journal*. 2018;190:E1426-E7.
16. Walsh AL, Lehmann S, Zabinski J, et al. Interventions to Prevent and Reduce Burnout Among Undergraduate and Graduate Medical Education Trainees: a Systematic Review. *Acad Psychiatry*. 2019;43:386-95.
17. Kassam A, Ellaway R. Acknowledging a Holistic Framework for Learner Wellness: The Human Capabilities Approach. *Acad Med*. 2020;95:9-10.
18. *Promoting Wellness Among Residents*. The International Conference on Residency Education: Royal College of Physicians and Surgeons of Canada;2017.

Cherak et al., (2020) Manuscript

19. Arksey H. Scoping the field: services for carers of people with mental health problems. *Health Soc Care Community*. 2003;11:335-44.
20. Joanna Briggs I. The Joanna Briggs Institute best practice information sheet: the effectiveness of pelvic floor muscle exercises on urinary incontinence in women following childbirth. *Nurs Health Sci*. 2011;13:378-81.
21. Moher D, Shamseer L, Clarke M, et al. Preferred reporting items for systematic review and meta-analysis protocols (PRISMA-P) 2015 statement. *Syst Rev*. 2015;4:1.
22. Tricco AC, Lillie E, Zarin W, et al. PRISMA Extension for Scoping Reviews (PRISMA-ScR): Checklist and Explanation. *Ann Intern Med*. 2018;169:467-73.
23. Terminology in Medical Education Royal College of Physicians and Surgeons of Canada; 2012. <http://www.royalcollege.ca/rcsite/educational-initiatives/terminology-medical-education-project-e>. Accessed June 16, 2020.
24. Ali J. The Trauma Evaluation and Management (TEAM) teaching module: its role for senior medical students in Canada. *Canadian journal of surgery. Journal canadien de chirurgie*. 2003;46:99-102.
25. Baird RP, Dan;Ganey, Michael;Hansen, Erik;Emil, Sherif. Partnership in fellowship: Comparative analysis of pediatric surgical training and evaluation of a fellow exchange between Canada and Kenya. *Journal of pediatric surgery*. 2016;51:1704-10.
26. Bland EO, L.;Brisson-Carroll, G.;Morel, C.;Holmes, P.;Gruslin, A. Influence of an educational program on medical students' attitudes to substance use disorders in pregnancy. *The American journal of drug and alcohol abuse*. 2001;27:483-90.
27. Brown AN, A.;Stanhope, A.;Koh, J.;Greenway, M.;Grierson, L. Can first-year medical students acquire quality improvement knowledge prior to substantial clinical exposure? A



Cherak et al., (2020) Manuscript

- 1  
2  
3 mixed-methods evaluation of a pre-clerkship curriculum that uses education as the context  
4  
5 for learning. *BMJ Quality and Safety*. 2018;27:576-82.  
6  
7  
8 28. Burbridge BK, Neil;Malin, Greg;Trinder, Krista;Pinelle, David. University of  
9  
10 Saskatchewan Radiology Courseware (USRC): an assessment of its utility for teaching  
11  
12 diagnostic imaging in the medical school curriculum. *Teaching and learning in medicine*.  
13  
14 2015;27:91-8.  
15  
16  
17 29. Byszewski AB, Kathryn;Latrous, Meriem. What Kind of Doctor Do You Want to Be?  
18  
19 Geriatric Medicine Podcast as a Career Planning Resource. *BioMed research*  
20  
21 *international*. 2017;2017:6183148.  
22  
23  
24 30. Cadieux DCL, Lorelei;Kwiatkowski, Daniela;Van Deven, Teresa;Bryant,  
25  
26 Murray;Tithecott, Gary. Challenges in Translation: Lessons from Using Business  
27  
28 Pedagogy to Teach Leadership in Undergraduate Medicine. *Teaching and learning in*  
29  
30 *medicine*. 2017;29:207-15.  
31  
32  
33 31. Campagna-Vaillancourt MM, John;Razack, Saleem;Nguyen, Lily H. P. Acceptability and  
34  
35 reliability of multiple mini interviews for admission to otolaryngology residency. *The*  
36  
37 *Laryngoscope*. 2014;124:91-6.  
38  
39  
40 32. Cassidy-Smith TNHk, J.;Nyce, A. L.;Chansky, M. E.;Baumann, B. M. Impact of a  
41  
42 teaching attending physician on medical student, resident, and faculty perceptions and  
43  
44 satisfaction. *Canadian Journal of Emergency Medicine*. 2011;13:259-66.  
45  
46  
47 33. Chew DJ, Denise;Thorne, Julie;Ho, Meghan;Andany, Nisha;Morin, Carly;Hoffman,  
48  
49 Nikki;Henshaw, Christe;Rourke, Sean B.;Fisher, Mark;Rachlis, Anita. Development,  
50  
51 implementation, and evaluation of a student-initiated undergraduate medical education  
52  
53 elective in HIV care. *Medical teacher*. 2012;34:398-403.  
54  
55  
56  
57  
58  
59  
60

Cherak et al., (2020) Manuscript

- 1  
2  
3 34. Cleave-Hogg DM, Pamela J. Experiential learning in an anaesthesia simulation centre:  
4  
5 analysis of students' comments. *Medical teacher*. 2002;24:23-6.  
6
- 7  
8 35. Crutcher RAT, Karen;Edwards, Alun;Taylor, Kathy;Norton, Peter. Multi-professional  
9  
10 education in diabetes. *Medical teacher*. 2004;26:435-43.  
11
- 12  
13 36. D'Urzo KAF, S. M.;Baillie, C.;Skelding, S.;Dobrowolski, S.;Houlden, R. L.;Tomasone, J.  
14  
15 R. Evaluating the Implementation and Impact of a Motivational Interviewing Workshop  
16  
17 on Medical Student Knowledge and Social Cognitions Towards Counseling Patients on  
18  
19 Lifestyle Behaviors. *Teaching and learning in medicine*. 2019:1-13.  
20
- 21  
22 37. Dore KKK, Sharyn;Ladhani, Moyez;Rolfson, Darryl;Kurtz, Doris;Kulasegaram,  
23  
24 Kulamakan;Cullimore, Amie J.;Norman, Geoffrey R.;Eva, Kevin W.;Bates,  
25  
26 Stephen;Reiter, Harold I. The reliability and acceptability of the Multiple Mini-Interview  
27  
28 as a selection instrument for postgraduate admissions. *Academic medicine : journal of the*  
29  
30 *Association of American Medical Colleges*. 2010;85:S60-3.  
31  
32
- 33  
34 38. Downar J, Krizova A, Ghaffar O, Zaretsky A. Neuroimaging week: a novel, engaging,  
35  
36 and effective curriculum for teaching neuroimaging to junior psychiatric residents. *Acad*  
37  
38 *Psychiatry*. 2010;34:119-24.  
39
- 40  
41 39. Dumont SB, N.;Morin, D.;Houle, N.;Iloko-Fundi, M. Implementing an interfaculty series  
42  
43 of courses on interprofessional collaboration in prelicensure health science curriculums.  
44  
45 *Education for health (Abingdon, England)*. 2010;23:395.  
46
- 47  
48 40. Duque GG, Susan;Bergman, Howard. Early clinical exposure to geriatric medicine in  
49  
50 second-year medical school students--the McGill experience. *Journal of the American*  
51  
52 *Geriatrics Society*. 2003;51:544-8.  
53
- 54  
55 41. Elharram MD, Trish;Lalande, Annie;Ge, Susan;Gao, Sophie;Noel, Geoffroy. Global  
56  
57 Health Values of a Multidirectional Near Peer Training Program in Surgery, Pathology,  
58  
59  
60

Cherak et al., (2020) Manuscript

- 1  
2  
3 Anatomy, Research Methodology, and Medical Education for Haitian, Rwandan, and  
4 Canadian Medical Students. *Annals of global health*. 2017;83:274-80.  
5  
6  
7  
8 42. Ellaway RHF, Patricia;Graves, Lisa;Campbell, Alanna. Left to their own devices: medical  
9 learners' use of mobile technologies. *Medical teacher*. 2014;36:130-8.  
10  
11  
12 43. Ens AJ, Katharine;Palmert, Mark R. Development of an Online Learning Module to  
13 Improve Pediatric Residents' Confidence and Knowledge of the Pubertal Examination.  
14 *The Journal of adolescent health : official publication of the Society for Adolescent*  
15 *Medicine*. 2017;60:292-8.  
16  
17  
18  
19  
20  
21 44. Fabreau GE, Meghan;Khanna, Suneil;Minty, Evan;Wallace, Jean E.;de Grood, Jill;Lewin,  
22 Adriane;Brown, Garielle;Bharwani, Aleem;Gilmour, Janet;Lemaire, Jane B. Shifting  
23 perceptions: a pre-post study to assess the impact of a senior resident rotation bundle.  
24 *BMC medical education*. 2013;13:115.  
25  
26  
27  
28  
29  
30  
31 45. Fairchild A, Watanabe S, Chambers C, Yurick J, Lem L, Tachynski P. Initiation of a  
32 multidisciplinary summer studentship in palliative and supportive care in oncology. *J*  
33 *Multidiscip Healthc*. 2012;5:231-9.  
34  
35  
36  
37  
38 46. Finley JPB, M. J.;Boutin, C.;Duncan, W. J.;Dyck, J. D.;Hosking, M. C.;Nykanen, D. A  
39 national network for the tele-education of Canadian residents in pediatric cardiology.  
40 *Cardiology in the young*. 2001;11:526-31.  
41  
42  
43  
44  
45 47. Garg AB, R.;Kason, Y. Teaching medical students how to break bad news. *CMAJ*.  
46 1997;156:1159-64.  
47  
48  
49 48. Gawad N, Moussa F, Christakis GT, Rutka JT. Planting the 'SEAD': early comprehensive  
50 exposure to surgery for medical students. *J Surg Educ*. 2013;70:487-94.  
51  
52  
53  
54 49. Gibson JN, Duc;Davidson, Jana;Panagiotopoulos, Constadina. Effectiveness of an  
55 educational handbook in improving psychiatry resident knowledge of second-generation  
56  
57  
58  
59  
60

Cherak et al., (2020) Manuscript

- 1  
2  
3 antipsychotics. *Academic psychiatry : the journal of the American Association of*  
4  
5 *Directors of Psychiatric Residency Training and the Association for Academic*  
6  
7 *Psychiatry*. 2015;39:154-9.  
8  
9
- 10 50. Gilic FS, I.;Blagojevic, A.;Schultz, K. The "Nightmares" course Effective simulation-  
11  
12 based acute care training method for family medicine residents. *Canadian Family*  
13  
14 *Physician*. 2015;61:S52.  
15  
16
- 17 51. Grabovac AC, N.;McKenna, M. Pilot study and evaluation of postgraduate course on  
18  
19 "The interface between spirituality, religion and psychiatry". *Academic Psychiatry*.  
20  
21 2008;32:332-7.  
22  
23
- 24 52. Greene BH, Linden;Gawad, Nada;Hamstra, Stanley J.;McLean, Laurie. Surgical  
25  
26 exploration and discovery program: inaugural involvement of otolaryngology - head and  
27  
28 neck surgery. *Journal of otolaryngology - head & neck surgery = Le Journal d'oto-rhino-*  
29  
30 *laryngologie et de chirurgie cervico-faciale*. 2015;44:3.  
31  
32
- 33 53. Hanna WCM, David S.;Fried, Gerald M.;Elhilali, Mostafa;Khwaja, Kosar A. Training  
34  
35 future surgeons for management roles: the resident-surgeon-manager conference.  
36  
37 *Archives of surgery (Chicago, Ill. : 1960)*. 2012;147:940-4.  
38  
39
- 40 54. Harding SRDE, M. F. Using a Lego-based communications simulation to introduce  
41  
42 medical students to patient-centered interviewing. *Teaching and learning in medicine*.  
43  
44 2001;13:130-5.  
45  
46
- 47 55. Haupt SD, T.;Smyth, M.;Thomas Toguri, J.;Roberts, A.;Raju, K. L.;Bowes, D.  
48  
49 MEDICAL STUDENT EXPOSURE TO RADIATION ONCOLOGY THROUGH THE  
50  
51 PRE-CLERKSHIP EXPLORATION PROGRAM (PREP): EFFECT ON CAREER  
52  
53 INTEREST AND UNDERSTANDING OF RADIATION ONCOLOGY. *Radiotherapy*  
54  
55 *and Oncology*. 2019;139:S33.  
56  
57  
58  
59  
60

Cherak et al., (2020) Manuscript

- 1  
2  
3 56. Ibrahim GM, Hoffart S, Lam RA, Minty EP, Ying MT, Schaefer JP. Think global, act  
4 local: medical students contextualize global health education. *Educ Health (Abingdon)*.  
5 2014;27:55-8.  
6  
7  
8  
9  
10 57. James MTM, Marcy J.;McLaughlin, Kevin. Evaluation of a multifaceted "resident-as-  
11 teacher" educational intervention to improve morning report. *BMC medical education*.  
12 2006;6:20.  
13  
14  
15  
16  
17 58. Jamniczky HAC, Darrel;Paget, Michael;Ramji, Qahir;Lenz, Ryan;McLaughlin,  
18 Kevin;Coderre, Sylvain;Ma, Irene W. Y. Cognitive load imposed by ultrasound-  
19 facilitated teaching does not adversely affect gross anatomy learning outcomes.  
20  
21  
22  
23  
24  
25  
26 59. Jefferies AS, Vibhuti. Clinicians prefer simple educational tools for implementing  
27 practice change. *Medical teacher*. 2011;33:e602-6.  
28  
29  
30  
31 60. Kanagasabai TM, Loreta;McGuire, Joy;Russell, Melanie;Vearncombe, Mary;Urowitz,  
32 Murray. Evidence-based strategies to improve immunization compliance of postgraduate  
33 medical trainees at large academic-medical facilities. *Healthcare quarterly (Toronto,*  
34 *Ont.)*. 2007;10:81-6.  
35  
36  
37  
38  
39  
40 61. Laidlaw TSM, Heather;Kaufman, David M.;Langille, Donald B.;Sargeant, Joan.  
41  
42 Implementing a communication skills programme in medical school: needs assessment  
43 and programme change. *Medical education*. 2002;36:115-24.  
44  
45  
46  
47 62. Law MR, Mark J.;Seitz, Dallas;Davidson, Marla;Madan, Robert;Wiens, Andrew.  
48  
49 Evaluation of a National Online Educational Program in Geriatric Psychiatry. *Academic*  
50 *psychiatry : the journal of the American Association of Directors of Psychiatric*  
51 *Residency Training and the Association for Academic Psychiatry*. 2016;40:923-7.  
52  
53  
54  
55  
56  
57  
58  
59  
60

Cherak et al., (2020) Manuscript

- 1  
2  
3 63. Law MV, P.;Campbell, J.;Craig, M.;Mylopoulos, M. Computing for Medicine: Can We  
4 Prepare Medical Students for the Future? *Academic medicine : journal of the Association*  
5  
6  
7  
8  
9  
10 64. Livingston MCB, S.;Emery, A. W.;Thomson, T. A.;Vaughan, G. A.;Wong, W.  
11  
12 T.;Youngash, R. N.;Zack, P. S. Six medical students in a community hospital. *Canadian*  
13  
14  
15  
16  
17 65. Lynch NPC, T.;Lehane, E.;Reardon, M.;Corrigan, M. Transatlantic peer-to-peer learning:  
18  
19 An initial feasibility analysis. *Surgical Innovation*. 2014;21:643-8.  
20  
21 66. Malhotra SH, Rose;Courneya, Carol-Ann. Internal medicine residents' perceptions of the  
22  
23  
24  
25  
26 67. McKendy KMP, N.;Fleischer, D. M.;Vassiliou, M. C. A learner-created virtual patient  
27  
28  
29  
30  
31  
32  
33 68. McMillan HJW, Hilary;Moreau, Katherine A.;Eady, Kaylee;Sell, Erick;Lobos, Anna-  
34  
35  
36  
37  
38  
39  
40  
41  
42  
43 69. Meterissian SL, Moishe;McLeod, Peter. Games as teaching tools in a surgical residency.  
44  
45  
46  
47 70. Morgan PJC-H, D. A Canadian simulation experience: Faculty and student opinions of a  
48  
49  
50  
51  
52 71. Myden CAA, C.;Kopp, G. D.;Hutchison, C. R. Computer-assisted surgery simulations  
53  
54  
55  
56  
57  
58  
59  
60

Cherak et al., (2020) Manuscript

- 1  
2  
3 *Computer aided surgery : official journal of the International Society for Computer Aided*  
4 *Surgery*. 2012;17:113-27.  
5  
6  
7  
8 72. Posluns ES, M. S.;Keystone, J. S.;Ennis, J.;Claessons, E. A. Rewarding medical teaching  
9 excellence in a major Canadian teaching hospital. *Medical teacher*. 1990;12:13-22.  
10  
11  
12 73. Roach VAB, Michael G.;Moore, Corey C.;Wilson, Timothy D. Is three-dimensional  
13 videography the cutting edge of surgical skill acquisition? *Anatomical sciences education*.  
14 2012;5:138-45.  
15  
16  
17  
18 74. Sachedina AKB, S.;Remtulla, A.;Sridhar, K.;Morrison, D. Preparing the Next Generation  
19 of Code Blue Leaders Through Simulation: What's Missing? *Simulation in healthcare :  
20 journal of the Society for Simulation in Healthcare*. 2019;14:77-81.  
21  
22  
23  
24  
25  
26 75. Shapiro SML, W. J.;Richards-Bentley, C. M. Evaluation of a communication skills  
27 program for first-year medical students at the University of Toronto. *BMC medical  
28 education*. 2009;9:11.  
29  
30  
31  
32  
33 76. Sheppard ES, M.;Dow, T.;Haupt, T. S.;McVeigh, S. The Effect of a 2-Week Pre-  
34 clerkship Residency Exploration Program on Specialty Interest and Understanding of  
35 Physical Medicine and Rehabilitation. *Archives of Rehabilitation Research and Clinical  
36 Translation*. 2020:100035.  
37  
38  
39  
40  
41  
42 77. Skoll MAD, Ruth;Liston, Robert. Fostering harmony in labor and delivery: a nursing  
43 preceptorship for clinical clerks. *Obstetrics and gynecology*. 2006;108:157-61.  
44  
45  
46  
47 78. Smyth MT, J. T.;Dow, T.;Haupt, T. S.;Roberts, A.;Raju, K. Medical student exposure to  
48 anesthesiology through the Pre-clerkship Residency Exploration Program: impact on  
49 career interest and understanding of anesthesiology. *Canadian Journal of Anesthesia*.  
50 2019;66:1126-8.  
51  
52  
53  
54  
55  
56  
57  
58  
59  
60

Cherak et al., (2020) Manuscript

- 1  
2  
3 79. Sternszus RS, Yvonne;Bhanji, Farhan;Andonian, Sero;Snell, Linda S. Evaluating a novel  
4 resident role-modelling programme. *The clinical teacher*. 2018;15:252-7.  
5  
6  
7 80. Sukhera JW, Michael;Teunissen, Pim W.;Lingard, Lorelei;Watling, Chris. Striving While  
8 Accepting: Exploring the Relationship Between Identity and Implicit Bias Recognition  
9 and Management. *Academic medicine : journal of the Association of American Medical*  
10 *Colleges*. 2018;93:S82-S8.  
11  
12  
13  
14  
15  
16  
17 81. Tait GRH, Brian D. Residents learning from a narrative experience with dying patients: a  
18 qualitative study. *Advances in health sciences education : theory and practice*.  
19  
20  
21 2013;18:727-43.  
22  
23  
24 82. Tan AR, Shelley Paige;Duerksen, Kimberley. Death is not always a failure: outcomes  
25 from implementing an online virtual patient clinical case in palliative care for family  
26 medicine clerkship. *Medical education online*. 2013;18:22711.  
27  
28  
29  
30  
31 83. Telner DB-B, Maja;Chan, David;Chester, Bob;Marlow, Bernard;Meuser,  
32 James;Rothman, Arthur;Harvey, Bart. Game-based versus traditional case-based learning:  
33 comparing effectiveness in stroke continuing medical education. *Canadian family*  
34 *physician Medecin de famille canadien*. 2010;56:e345-51.  
35  
36  
37  
38  
39  
40 84. Turner SRW, Jonathan;Poth, Cheryl;Rogers, W. Todd. Preparing students for clerkship: a  
41 resident shadowing program. *Academic medicine : journal of the Association of American*  
42 *Medical Colleges*. 2012;87:1288-91.  
43  
44  
45  
46  
47 85. Welsher AR, D.;Khan, Z.;VanderBeek, L.;Kapralos, B.;Grierson, L. E. M. The  
48 Application of Observational Practice and Educational Networking in Simulation-Based  
49 and Distributed Medical Education Contexts. *Simulation in healthcare : journal of the*  
50 *Society for Simulation in Healthcare*. 2018;13:3-10.  
51  
52  
53  
54  
55  
56  
57  
58  
59  
60



Cherak et al., (2020) Manuscript

- 1  
2  
3 86. Willett TKG, Michael;Cardinal, Pierre;Karas, Philip. An evaluation of the Acute Critical  
4  
5 Events Simulation (ACES) course for family medicine residents. *Canadian journal of*  
6  
7 *rural medicine : the official journal of the Society of Rural Physicians of Canada =*  
8  
9 *Journal canadien de la medecine rurale : le journal officiel de la Societe de medecine*  
10  
11 *rurale du Canada.* 2011;16:89-95.  
12  
13  
14 87. Yeung CF, F.;Farr, S.;Law, M.;Albert, L. Development and implementation of a  
15  
16 longitudinal students as teachers program: participant satisfaction and implications for  
17  
18 medical student teaching and learning. *BMC medical education.* 2017;17:28.  
19  
20  
21 88. Zahrai AC, Jaskarndip;Stojimirovic, Dan;Schemitsch, Emil H.;Yee, Albert;Kraemer,  
22  
23 William. Quality of life and educational benefit among orthopedic surgery residents: a  
24  
25 prospective, multicentre comparison of the night float and the standard call systems.  
26  
27 *Canadian journal of surgery. Journal canadien de chirurgie.* 2011;54:25-32.  
28  
29  
30 89. Spielberger CD, Gorsuch, R. L., Lushene, R., Vagg, P. R., & Jacobs, G. A. *Manual for*  
31  
32 *the State-Trait Anxiety Inventory.* Palo Alto, CS1983.  
33  
34  
35 90. Singh MK, Ogrinc G, Cox KR, et al. The Quality Improvement Knowledge Application  
36  
37 Tool Revised (QIKAT-R). *Acad Med.* 2014;89:1386-91.  
38  
39  
40 91. Gagliardi AR, Webster F, Straus SE. Designing a knowledge translation mentorship  
41  
42 program to support the implementation of evidence-based innovations. *BMC Health Serv*  
43  
44 *Res.* 2015;15:198.  
45  
46  
47 92. Gagliardi ARW, F. C.;Anderson, M. A. B.;Davis, D. The role of collegial interaction in  
48  
49 continuing professional development. *Journal of Continuing Education in the Health*  
50  
51 *Professions.* 2007;27:214-9.  
52  
53  
54 93. Straus SE, Sackett DL. Clinician-trialist rounds: 10. Mentoring - part 4: attributes of an  
55  
56 effective mentor. *Clin Trials.* 2012;9:367-9.  
57  
58  
59  
60

Cherak et al., (2020) Manuscript

- 1  
2  
3 94. Straus SE, Straus C, Tzanetos K, International Campaign to Revitalise Academic M.  
4  
5 Career choice in academic medicine: systematic review. *J Gen Intern Med.* 2006;21:1222-  
6  
7 9.  
8  
9
- 10 95. McKenna AM, Straus SE. Charting a professional course: a review of mentorship in  
11  
12 medicine. *J Am Coll Radiol.* 2011;8:109-12.  
13
- 14 96. Straus SE, Johnson MO, Marquez C, Feldman MD. Characteristics of successful and  
15  
16 failed mentoring relationships: a qualitative study across two academic health centers.  
17  
18 *Acad Med.* 2013;88:82-9.  
19
- 20 97. Sambunjak D, Straus SE, Marusic A. A systematic review of qualitative research on the  
21  
22 meaning and characteristics of mentoring in academic medicine. *J Gen Intern Med.*  
23  
24 2010;25:72-8.  
25  
26  
27
- 28 98. Sambunjak D, Straus SE, Marusic A. Mentoring in academic medicine: a systematic  
29  
30 review. *JAMA.* 2006;296:1103-15.  
31
- 32 99. Allen TD, Eby LT, Lentz E. Mentorship behaviors and mentorship quality associated with  
33  
34 formal mentoring programs: closing the gap between research and practice. *J Appl*  
35  
36 *Psychol.* 2006;91:567-78.  
37  
38
- 39 100. Sastre EA, Burke EE, Silverstein E, et al. Improvements in medical school wellness and  
40  
41 career counseling: A comparison of one-on-one advising to an Advisory College  
42  
43 Program. *Med Teach.* 2010;32:e429-35.  
44
- 45 101. Ficklin FL, Hazelwood JD, Carter JE, Shellhamer RH. Evaluation of a small-group  
46  
47 support program for first-year medical students. *J Med Educ.* 1983;58:817-9.  
48
- 49 102. Harriman DH, N.;MacNeily, A.;Gourlay, W. Perceptions and attitudes toward the impact  
50  
51 of clinical fellows on urology resident training. *Urology.* 2013;82:S189.  
52  
53  
54  
55  
56  
57  
58  
59  
60

Cherak et al., (2020) Manuscript

103. Rose GL, Rukstalis MR, Schuckit MA. Informal mentoring between faculty and medical students. *Acad Med.* 2005;80:344-8.
104. Plaut SM, Maxwell SA, Seng L, O'Brien JJ, Fairclough GF, Jr. Mental health services for medical students: perceptions of students, student affairs deans, and mental health providers. *Acad Med.* 1993;68:360-5.
105. Gentile JP, Roman B. Medical student mental health services: psychiatrists treating medical students. *Psychiatry (Edgmont).* 2009;6:38-45.
106. Knaak S, Mantler E, Szeto A. Mental illness-related stigma in healthcare: Barriers to access and care and evidence-based solutions. *Healthc Manage Forum.* 2017;30:111-6.
107. Dyrbye LN, Eacker A, Durning SJ, et al. The Impact of Stigma and Personal Experiences on the Help-Seeking Behaviors of Medical Students With Burnout. *Acad Med.* 2015;90:961-9.
108. Givens JL, Tjia J. Depressed medical students' use of mental health services and barriers to use. *Acad Med.* 2002;77:918-21.
109. Wilkes C, Lewis T, Brager N, et al. Wellbeing and mental health amongst medical students in Canada. *Int Rev Psychiatry.* 2019;31:584-7.
110. Thompson D, Goebert D, Takeshita J. A program for reducing depressive symptoms and suicidal ideation in medical students. *Acad Med.* 2010;85:1635-9.
111. Anderson EW, White KM. "This Is What Family Does": The Family Experience of Caring for Serious Illness. *Am J Hosp Palliat Care.* 2018;35:348-54.
112. Block J, Kremen AM. IQ and ego-resiliency: conceptual and empirical connections and separateness. *J Pers Soc Psychol.* 1996;70:349-61.
113. Lazarus RS. From psychological stress to the emotions: a history of changing outlooks. *Annu Rev Psychol.* 1993;44:1-21.

Cherak et al., (2020) Manuscript

- 1  
2  
3 114. Kumpfer KL, Bluth B. Parent/child transactional processes predictive of resilience or  
4 vulnerability to "substance abuse disorders". *Subst Use Misuse*. 2004;39:671-98.  
5  
6  
7 115. Kumpfer KL, Summerhays JF. Prevention approaches to enhance resilience among high-  
8 risk youth: comments on the papers of Dishion & Connell and Greenberg. *Ann N Y Acad*  
9 *Sci*. 2006;1094:151-63.  
10  
11  
12  
13  
14 116. Warburton DE, Nicol CW, Bredin SS. Prescribing exercise as preventive therapy. *CMAJ*.  
15 2006;174:961-74.  
16  
17  
18  
19 117. Kennedy MF, Meeuwisse WH. Exercise counselling by family physicians in Canada.  
20 *Prev Med*. 2003;37:226-32.  
21  
22  
23  
24 118. Khan R, Rehman R, Baig M, Hussain M, Khan M, Syed F. Dimensions of physical  
25 wellness among medical students of public and private medical colleges in Pakistan.  
26 *Saudi Med J*. 2015;36:754-8.  
27  
28  
29  
30  
31 119. Holtz KA, Kokotilo KJ, Fitzgerald BE, Frank E. Exercise behaviour and attitudes among  
32 fourth-year medical students at the University of British Columbia. *Can Fam Physician*.  
33 2013;59:e26-32.  
34  
35  
36  
37  
38 120. Tremblay MS, Warburton DE, Janssen I, et al. New Canadian physical activity  
39 guidelines. *Appl Physiol Nutr Metab*. 2011;36:36-46; 7-58.  
40  
41  
42  
43 121. Frank E, Tong E, Lobelo F, Carrera J, Duperly J. Physical activity levels and counseling  
44 practices of U.S. medical students. *Med Sci Sports Exerc*. 2008;40:413-21.  
45  
46  
47  
48 122. Vallance JK, Wylie M, MacDonald R. Medical students' self-perceived competence and  
49 prescription of patient-centered physical activity. *Prev Med*. 2009;48:164-6.  
50  
51  
52  
53 123. Glauser W. Quebec medical schools slow to adopt pass/fail system. *CMAJ*.  
54 2017;189:E1499-E500.  
55  
56  
57  
58  
59  
60

Cherak et al., (2020) Manuscript

124. Reed DA, Shanafelt TD, Satele DW, et al. Relationship of pass/fail grading and curriculum structure with well-being among preclinical medical students: a multi-institutional study. *Acad Med.* 2011;86:1367-73.
125. White CB, Fantone JC. Pass-fail grading: laying the foundation for self-regulated learning. *Adv Health Sci Educ Theory Pract.* 2010;15:469-77.
126. Spring L, Robillard D, Gehlbach L, Simas TA. Impact of pass/fail grading on medical students' well-being and academic outcomes. *Med Educ.* 2011;45:867-77.
127. Vosti KL, Jacobs CD. Outcome measurement in postgraduate year one of graduates from a medical school with a pass/fail grading system. *Acad Med.* 1999;74:547-9.
128. Robins LS, Fantone JC, Oh MS, Alexander GL, Schlafer M, Davis WK. The effect of pass/fail grading and weekly quizzes on first-year students' performances and satisfaction. *Acad Med.* 1995;70:327-9.
129. Aminazadeh NF, Forough;Naeeni, Amir;Naeeni, Marjan;Reid, Susan;Kashfi, Arash;Kahnamoui, Kamyar. Is Canadian surgical residency training stressful? *Canadian journal of surgery. Journal canadien de chirurgie.* 2012;55:S145-51.
130. Vogel L. Medical education needs reform to improve student well-being and reduce burnout, say experts. *CMAJ.* 2018;190:E1426-E7.
131. Vogel L. Medical trainees in research-focused programs at higher risk for depression. *CMAJ : Canadian Medical Association journal = journal de l'Association medicale canadienne.* 2019;191:E240.
132. Evans TM, Bira L, Gastelum JB, Weiss LT, Vanderford NL. Evidence for a mental health crisis in graduate education. *Nat Biotechnol.* 2018;36:282-4.
133. Storrie K, Ahern K, Tuckett A. A systematic review: Students with mental health problems--a growing problem. *Int J Nurs Pract.* 2010;16:1-6.

Cherak et al., (2020) Manuscript

- 1  
2  
3 134. Skinnider MA, Squair JW, Twa DDW, et al. Characteristics and outcomes of Canadian  
4 MD/PhD program graduates: a cross-sectional survey. *CMAJ Open*. 2017;5:E308-E14.  
5  
6  
7 135. Brass LF, Akabas MH, Burnley LD, Engman DM, Wiley CA, Andersen OS. Are MD-  
8 PhD programs meeting their goals? An analysis of career choices made by graduates of  
9 24 MD-PhD programs. *Acad Med*. 2010;85:692-701.  
10  
11  
12 136. McKenna KM, Hashimoto DA, Maguire MS, Bynum WEt. The Missing Link:  
13 Connection Is the Key to Resilience in Medical Education. *Acad Med*. 2016;91:1197-9.  
14  
15  
16 137. Nussbaum MC. *Women and Human Development: The Capabilities Approach*.  
17 Cambridge, UK: Cambridge University Press; 2001.  
18  
19  
20 138. Swanwick T, Forrest, K., O'Brien, B.C. *Understanding Medical Education: Evidence,*  
21 *Theory, and Practice*. Third ed. Hoboken, NJ: John Wiley & Sons, Inc; 2019.  
22  
23  
24 139. Kim KW, Lim HC, Park JH, Park SG, Park YJ, Cho HH. Developing a Basic Scale for  
25 Workers' Psychological Burden from the Perspective of Occupational Safety and Health.  
26 *Saf Health Work*. 2018;9:224-31.  
27  
28  
29 140. de Souza M. Promoting Wholeness and Wellbeing in Education: Exploring Aspects of the  
30 Spiritual Dimension. In: de Souza M, Francis LJ, O'Higgins-Norman J, Scott D, eds.  
31 *International Handbook of Education for Spirituality, Care and Wellbeing*. Dordrecht:  
32 Springer Netherlands; 2009:677-92.  
33  
34  
35 141. Kripalani S, Bussey-Jones J, Katz MG, Genao I. A prescription for cultural competence in  
36 medical education. *J Gen Intern Med*. 2006;21:1116-20.  
37  
38  
39 142. Asch DA. Evaluating residency programs by whether they produce good doctors. *LDI*  
40 *Issue Brief*. 2009;15:1-4.  
41  
42  
43  
44  
45  
46  
47  
48  
49  
50  
51  
52  
53  
54  
55  
56  
57  
58  
59  
60

Cherak et al., (2020) Manuscript

1  
2  
3 143. Wong BM, Holmboe ES. Transforming the Academic Faculty Perspective in Graduate  
4  
5 Medical Education to Better Align Educational and Clinical Outcomes. *Acad Med.*  
6  
7 2016;91:473-9.  
8  
9  
10  
11  
12  
13  
14  
15  
16  
17  
18  
19  
20  
21  
22  
23  
24  
25  
26  
27  
28  
29  
30  
31  
32  
33  
34  
35  
36  
37  
38  
39  
40  
41  
42  
43  
44  
45  
46  
47  
48  
49  
50  
51  
52  
53  
54  
55  
56  
57  
58  
59  
60

Confidential

Cherak et al., (2020) Tables and Figures

**Table 1.** Characteristics of included studies<sup>1</sup>

| Undergraduate Non-Medical Students      |           |             |                 |                     |                              |                    |                                         |
|-----------------------------------------|-----------|-------------|-----------------|---------------------|------------------------------|--------------------|-----------------------------------------|
| Author, Year                            | Timeframe | Respondents | Program         | Design <sup>2</sup> | Wellness Domain <sup>3</sup> | Level <sup>4</sup> | Effects, significance <sup>5</sup>      |
| Dumont et al., 2010 <sup>1</sup>        | N/S       | 215         | Health Sciences | Uncontrolled        | Intellectual, Occupational   | System             | Positive, significant                   |
| Roach et al., 2012 <sup>2</sup>         | N/S       | 43          | Health Sciences | RCT                 | Intellectual, Occupational   | System             | Positive, not significant               |
| Undergraduate Medical Students          |           |             |                 |                     |                              |                    |                                         |
| Author, Year                            | Timeframe | Respondents | Program         | Design <sup>2</sup> | Wellness Domain <sup>3</sup> | Level <sup>4</sup> | Effects, significance <sup>5</sup>      |
| Ali et al., 2003 <sup>3</sup>           | N/S       | 29          | N/A             | RCT                 | Intellectual                 | Individual         | Positive, significant                   |
| Bland et al., 2001 <sup>4</sup>         | 2001      | 84          | N/A             | Uncontrolled        | Intellectual                 | Program            | Positive, significant                   |
| Brown et al., 2018 <sup>5</sup>         | 2016      | 123         | N/A             | Uncontrolled        | Intellectual, Occupational   | Individual         | Positive, significant                   |
| Burbridge et al., 2015 <sup>6</sup>     | 2013-2015 | 135         | N/A             | Quasi-experimental  | Intellectual, Occupational   | System             | Positive, significant                   |
| Byszewski et al., 2017 <sup>7</sup>     | 2014      | 93          | N/A             | Uncontrolled        | Intellectual, Occupational   | Individual         | Positive, significant                   |
| Cadieux et al., 2017 <sup>8</sup>       | N/S       | 62          | N/A             | Uncontrolled        | Intellectual, Occupational   | System             | Negative, not assessed                  |
| Cassidy-Smith et al., 2011 <sup>9</sup> | 2005      | 26          | N/A             | Uncontrolled        | Intellectual, Occupational   | Program            | Positive, significant                   |
| Chew et al., 2012 <sup>10</sup>         | 2008-2009 | 18          | N/A             | Uncontrolled        | Intellectual, Occupational   | Individual         | Positive, significant                   |
| Cleave-Hogg et al., 2002 <sup>11</sup>  | N/S       | 145         | N/A             | Uncontrolled        | Intellectual, Occupational   | Program            | Positive, not assessed                  |
| D'Urzo et al., 2019 <sup>12</sup>       | N/S       | 27          | N/A             | Uncontrolled        | Social, Intellectual         | Program            | Positive, not significant               |
| Duque et al., 2003 <sup>13</sup>        | 1999-2000 | 182         | N/A             | Uncontrolled        | Intellectual                 | Program            | Positive, significant                   |
| Elharram et al., 2017 <sup>14</sup>     | 2015      | 7           | N/A             | Uncontrolled        | Social, Intellectual         | System             | Positive, significant                   |
| Ellaway et al., 2014 <sup>15</sup>      | 2010-2012 | 101         | N/A             | Uncontrolled        | Social, Intellectual         | System             | Positive, not significant               |
| Fairchild et al., 2012 <sup>16</sup>    | N/S       | 8           | N/A             | Uncontrolled        | Social, Intellectual         | System             | Positive, not assessed                  |
| Garg et al., 1997 <sup>17</sup>         | 1987      | 359         | N/A             | Uncontrolled        | Social, Intellectual         | Program            | Positive, significant                   |
| Gawad et al., 2013 <sup>18</sup>        | N/S       | 21          | N/A             | Uncontrolled        | Intellectual, Occupational   | System             | Positive, significant                   |
| Greene et al., 2015 <sup>19</sup>       | 2015      | 18          | N/A             | Uncontrolled        | Intellectual, Occupational   | Program            | Positive, significant                   |
| Harding, et al., 2001 <sup>20</sup>     | N/S       | N/S         | N/A             | Uncontrolled        | Social, Intellectual         | Program            | Positive, significant                   |
| Haupt et al., 2019 <sup>21</sup>        | 2018      | 37          | N/A             | Uncontrolled        | Occupational                 | Individual         | Positive, significant                   |
| Ibrahim et al., 2014 <sup>22</sup>      | 2014      | 143         | N/A             | Uncontrolled        | Social, Intellectual         | System             | Positive, significant                   |
| Jamniczky et al., 2017 <sup>23</sup>    | 2014      | 161         | N/A             | Quasi-experimental  | Intellectual                 | Individual         | Indeterminate, significant <sup>6</sup> |
| Law et al., 2019 <sup>24</sup>          | 2017      | 17          | N/A             | Uncontrolled        | Intellectual, Occupational   | Individual         | Positive, not assessed                  |
| Livingston et al., 1973 <sup>25</sup>   | 1973      | 6           | N/A             | Uncontrolled        | Occupational                 | Individual         | Positive, not assessed                  |
| Lynch et al., 2014 <sup>26</sup>        | N/S       | 4           | N/A             | Uncontrolled        | Social, Intellectual         | Individual         | Positive, not assessed                  |
| Morgan et al., 2000 <sup>27</sup>       | 1998-1999 | 145         | N/A             | Uncontrolled        | Intellectual                 | Program            | Positive, not assessed                  |



## Cherak et al., (2020) Tables and Figures

| Shapiro et al., 2009 <sup>28</sup>               | 1996-2000 | 38          | N/A                                         | Quasi-experimental         | Social                             | Individual         | Indeterminate, significant <sup>7</sup>     |
|--------------------------------------------------|-----------|-------------|---------------------------------------------|----------------------------|------------------------------------|--------------------|---------------------------------------------|
| Sheppard et al., 2020 <sup>29</sup>              | N/S       | 37          | N/A                                         | Uncontrolled               | Occupational                       | Individual         | Positive, significant                       |
| Skoll et al., 2006 <sup>30</sup>                 | 2003-2004 | 92          | N/A                                         | Uncontrolled               | Occupational                       | Program            | Positive, significant                       |
| Smyth et al., 2019 <sup>31</sup>                 | 2018      | 37          | N/A                                         | Uncontrolled [qualitative] | Occupational                       | Individual         | Positive, significant                       |
| Turner et al., 2012 <sup>32</sup>                | 2009-2010 | 63          | N/A                                         | Quasi-experimental         | Intellectual, Occupational         | System             | Positive, significant                       |
| Welsher et al., 2018 <sup>33</sup>               | N/S       | 23          | N/A                                         | Quasi-experimental         | Intellectual                       | Individual         | Positive, not significant                   |
| Yeung et al., 2017 <sup>34</sup>                 | 2014      | 20          | N/A                                         | Uncontrolled               | Social, Intellectual               | Individual         | Positive, significant                       |
| Postgraduate Medical Students                    |           |             |                                             |                            |                                    |                    |                                             |
| Author, Year                                     | Timeframe | Respondents | Program                                     | Design <sup>2</sup>        | Wellness Domain <sup>3</sup>       | Level <sup>4</sup> | Effects, significance <sup>5</sup>          |
| Baird et al., 2016 <sup>35</sup>                 | 2016      | 10          | Pediatric Surgery                           | Uncontrolled               | Social, Intellectual, Occupational | Program            | Positive, significant <sup>8</sup>          |
| Campagna-Vaillancourt et al., 2014 <sup>36</sup> | 2011-2013 | 45          | Otolaryngology–Head and Neck Surgery        | Uncontrolled               | Social                             | Program            | Positive, not assessed                      |
| Crutcher et al., 2004 <sup>37</sup>              | N/S       | 56          | Family                                      | Quasi-experimental         | Intellectual, Occupational         | System             | Positive, significant                       |
| Dore et al., 2010 <sup>38</sup>                  | 2008-2010 | 484         | Obstetrics–Gynecology, Pediatrics, Internal | Uncontrolled               | Social                             | Program            | Positive, significant                       |
| Downar et al., 2010 <sup>39</sup>                | N/S       | 25          | Psychiatry                                  | Uncontrolled               | Intellectual, Occupational         | Individual         | Positive, significant                       |
| Ens et al., 2017 <sup>40</sup>                   | 2013      | 97          | Pediatrics                                  | RCT                        | Intellectual, Occupational         | Program            | Positive, significant                       |
| Fabreau et al., 2013 <sup>41</sup>               | 2010      | 63          | Internal                                    | Uncontrolled               | Social, Mental                     | Program            | Indeterminate, not significant <sup>9</sup> |
| Finley et al., 2001 <sup>42</sup>                | 1998      | 93          | Pediatric Cardiology                        | Uncontrolled               | Intellectual                       | Program            | Positive, not assessed                      |
| Gibson et al., 2015 <sup>43</sup>                | 2009-2013 | 32          | Psychiatry                                  | Uncontrolled               | Intellectual                       | Program            | Positive, significant                       |
| Gilic et al., 2015 <sup>44</sup>                 | 2012      | 40          | Family                                      | Quasi-experimental         | Intellectual, Occupational         | Program            | Positive, significant                       |
| Grabovac et al., 2008 <sup>45</sup>              | 2005      | 22          | Psychiatry                                  | Uncontrolled               | Intellectual                       | Program            | Positive, significant                       |
| Hanna et al., 2012 <sup>46</sup>                 | N/S       | 43          | Surgical subspecialties                     | Uncontrolled               | Occupational                       | System             | Positive, significant                       |
| James et al., 2006 <sup>47</sup>                 | N/S       | 46          | Internal                                    | Uncontrolled               | Social, Intellectual               | Program            | Positive, significant                       |
| Jefferies et al., 2011 <sup>48</sup>             | 2009      | 20          | Neonatal Intensive Care                     | Uncontrolled               | Intellectual, Occupational         | System             | Positive, not significant                   |
| Kanagasabai et al., 2007 <sup>49</sup>           | 2003-2005 | 5917        | Any                                         | Uncontrolled               | Physical, Occupational             | System             | Positive, significant                       |
| Law et al., 2016 <sup>50</sup>                   | 2012-2013 | 29          | Geriatric Psychiatry                        | Uncontrolled               | Intellectual                       | Individual         | Positive, not significant                   |

Cherak et al., (2020) Tables and Figures

| Malhotra et al., 2008 <sup>51</sup>                   | 2005      | 12          | Internal                    | Uncontrolled        | Mental, Intellectual               | Program            | Positive, N/A                            |
|-------------------------------------------------------|-----------|-------------|-----------------------------|---------------------|------------------------------------|--------------------|------------------------------------------|
| McKendy et al., 2016 <sup>52</sup>                    | N/S       | 24          | Surgical subspecialties     | Uncontrolled        | Intellectual                       | Program            | Indeterminate, significant <sup>10</sup> |
| McMillan et al., 2016 <sup>53</sup>                   | 2014      | 16          | Pediatrics                  | Uncontrolled        | Mental, Intellectual               | Individual         | Positive, not significant                |
| Meterissian et al., 2007 <sup>54</sup>                | 2006-2007 | 40          | General Surgery             | Uncontrolled        | Intellectual                       | Program            | Positive, significant                    |
| Myden et al., 2012 <sup>55</sup>                      | N/S       | 6           | Orthopedics                 | Quasi-experimental  | Intellectual, Occupational         | Program            | Positive, significant                    |
| Sachedina et al., 2019 <sup>56</sup>                  | N/S       | 17          | Cardiac Critical Care       | Uncontrolled        | Occupational                       | Individual         | Positive, N/A                            |
| Sternszus et al., 2018 <sup>57</sup>                  | 2015-2016 | 25          | N/S                         | Uncontrolled        | Social, Intellectual               | System             | Positive, not assessed                   |
| Sukhera et al., 2018 <sup>58</sup>                    | 2017      | 10          | Psychiatry                  | Uncontrolled        | Mental                             | System             | Positive, N/A                            |
| Tait et al., 2013 <sup>59</sup>                       | N/S       | 7           | Family Medicine, Psychiatry | Uncontrolled        | Mental, Intellectual, Occupational | Individual         | Positive, N/A                            |
| Tan et al., 2013 <sup>60</sup>                        | 2010-2011 | 130         | Family Medicine             | Uncontrolled        | Social, Occupational               | Program            | Positive, not significant                |
| Telner et al., 2010 <sup>61</sup>                     | N/S       | 3           | Family                      | RCT                 | Intellectual                       | System             | Positive, not significant                |
| Willett et al., 2011 <sup>62</sup>                    | 2009      | 37          | Family Medicine             | Uncontrolled        | Intellectual                       | Program            | Positive, significant                    |
| Zahrai et al., 2011 <sup>63</sup>                     | 2009      | 16          | Orthopedic Surgery          | Quasi-experimental  | Mental, Intellectual               | Program            | Negative, significant                    |
| Undergraduate Medical & Postgraduate Medical Students |           |             |                             |                     |                                    |                    |                                          |
| Author, Year                                          | Timeframe | Respondents | Program                     | Design <sup>2</sup> | Wellness Domain <sup>3</sup>       | Level <sup>4</sup> | Effects, significance <sup>5</sup>       |
| Posluns et al., 1990 <sup>64</sup>                    | 1990      | N/S         | Any                         | Uncontrolled        | Intellectual                       | System             | N/S                                      |
| Laidlaw et al., 2002 <sup>65</sup>                    | 1997-1998 | 318         | Any                         | Uncontrolled        | Intellectual, Occupational         | System             | Positive, significant                    |

<sup>1</sup>Categorized by medical learner population then alphabetically by author

<sup>2</sup>RCT, randomized controlled trial; Quasi-experimental, non-randomized controlled trial; Uncontrolled, non-randomized uncontrolled trial

<sup>3</sup>Social, mental, physical, intellectual and/or occupational wellness [Supplemental Table 3]

<sup>4</sup>Individual, program or system level [Supplemental Table 3]

<sup>5</sup>For main effects of wellness intervention

<sup>6</sup>Intervention did not improve learner knowledge but compliance was high and perceived impactful to intellectual wellness

<sup>7</sup>Intervention improved learner communication skills but not learner confidence and perceptions of engaging communications; both social wellness

<sup>8</sup>Learners agreed the intervention improved intellectual and occupational wellness and logistical challenges negatively impacted social wellness

<sup>9</sup>Learners felt social and mental wellness were relatively unaffected by the intervention

<sup>10</sup>Intervention failed to improve learner knowledge but satisfaction with curriculum was significantly higher, both related to intellectual wellness

N/A, not applicable; N/S, not stated

Cherak et al., (2020) Tables and Figures

**Table 2.** Quantitative outcomes measured for wellness domains<sup>1,2</sup>

| Social Wellness<br>N=17 (26%) |                    | Mental Wellness<br>N=6 (9%) |                    | Physical Wellness<br>N=1 (2%) |                    | Intellectual Wellness<br>N=51 (78%) |                    | Occupational Wellness<br>N=32 (49%) |                    |
|-------------------------------|--------------------|-----------------------------|--------------------|-------------------------------|--------------------|-------------------------------------|--------------------|-------------------------------------|--------------------|
| Outcome                       | N (%) <sup>3</sup> | Outcome                     | N (%) <sup>3</sup> | Outcome                       | N (%) <sup>3</sup> | Outcome                             | N (%) <sup>3</sup> | Outcome                             | N (%) <sup>3</sup> |
| Agreement                     | 7 (41%)            | Anxiety symptoms            | 1 (17%)            | Compliance                    | 1 (100%)           | Anxiety symptoms                    | 1 (2%)             | Agreement                           | 5 (16%)            |
| Behavior                      | 1 (6%)             | Experience                  | 4 (57%)            |                               |                    | Attitudes                           | 12 (23%)           | Attitudes                           | 3 (9%)             |
| Competence                    | 1 (6%)             | Implicit association        | 1 (17%)            |                               |                    | Compliance                          | 8 (16%)            | Compliance                          | 3 (9%)             |
| Confidence                    | 3 (18%)            | Quality of life             | 1 (17%)            |                               |                    | Confidence                          | 4 (8%)             | Competence                          | 2 (6%)             |
| Content                       | 1 (6%)             | Satisfaction                | 2 (33%)            |                               |                    | Competence                          | 4 (8%)             | Confidence                          | 2 (6%)             |
| Experience                    | 3 (18%)            | Skills                      | 1 (17%)            |                               |                    | Content                             | 6 (12%)            | Duties                              | 1 (3%)             |
| Knowledge                     | 3 (18%)            | Stressors                   | 1 (17%)            |                               |                    | Duties                              | 3 (6%)             | Experience                          | 8 (25%)            |
| Learning                      | 1 (6%)             |                             |                    |                               |                    | Goals                               | 1 (2%)             | Goals                               | 1 (3%)             |
| Perceptions                   | 6 (35%)            |                             |                    |                               |                    | Interest                            | 10 (20%)           | Interest                            | 2 (6%)             |
| Preparedness                  | 1 (6%)             |                             |                    |                               |                    | Experience                          | 1 (2%)             | Knowledge                           | 14 (44%)           |
| Reaction                      | 1 (6%)             |                             |                    |                               |                    | Goals                               | 12 (23%)           | Perceptions                         | 7 (22%)            |
| Satisfaction                  | 10 (59%)           |                             |                    |                               |                    | Interest                            | 23 (45%)           | Performance                         | 2 (6%)             |
| Skills                        | 2 (12%)            |                             |                    |                               |                    | Knowledge                           | 12 (23%)           | Preparedness                        | 2 (6%)             |
| Willingness                   | 1 (6%)             |                             |                    |                               |                    | Perceptions                         | 1 (2%)             | Satisfaction                        | 8 (25%)            |
|                               |                    |                             |                    |                               |                    | Performance                         | 1 (2%)             | Skills                              | 3 (9%)             |
|                               |                    |                             |                    |                               |                    | Preparedness                        | 1 (2%)             | Usefulness                          | 1 (3%)             |
|                               |                    |                             |                    |                               |                    | Quality of intervention             | 1 (2%)             |                                     |                    |
|                               |                    |                             |                    |                               |                    | Quality of life                     | 1 (2%)             |                                     |                    |
|                               |                    |                             |                    |                               |                    | Satisfaction                        | 16 (31%)           |                                     |                    |
|                               |                    |                             |                    |                               |                    | Skills                              | 5 (10%)            |                                     |                    |
|                               |                    |                             |                    |                               |                    | Usefulness                          | 1 (2%)             |                                     |                    |
|                               |                    |                             |                    |                               |                    | Willingness                         | 1 (2%)             |                                     |                    |

<sup>1</sup>Social, mental, physical, intellectual and/or occupational wellness [Supplemental Table 3]<sup>2</sup>More than one outcome measure was often reported in a single study for each wellness domain<sup>3</sup>N, number of studies that reported each outcome; %, N as a proportion of studies for that domain

Cherak et al., (2020) Tables and Figures

**Table 3.** Summary of findings from qualitative studies<sup>1,2</sup>

| Undergraduate Medical Students |                              |                                 |                 |                                                                                                                                                                                                                                                                                                                                                                                                                                |                                                                                                                                                                                                                                                                    |
|--------------------------------|------------------------------|---------------------------------|-----------------|--------------------------------------------------------------------------------------------------------------------------------------------------------------------------------------------------------------------------------------------------------------------------------------------------------------------------------------------------------------------------------------------------------------------------------|--------------------------------------------------------------------------------------------------------------------------------------------------------------------------------------------------------------------------------------------------------------------|
| Author, Year                   | Wellness Domain <sup>3</sup> | Intervention Level <sup>4</sup> | Analysis        | Themes or Theory                                                                                                                                                                                                                                                                                                                                                                                                               | Authors' Conclusions                                                                                                                                                                                                                                               |
| Brown et al., 2018             | Intellectual, Occupational   | Individual                      | Thematic        | Continuous support; Genuine interest in improving medical education; Team-based learning and problem solving; Regular project feedback; Access to QI education resources                                                                                                                                                                                                                                                       | Medical education is an appropriate context to teach pre-clerkship medical students about quality improvement, which might lead to an increase in knowledge of and comfort with quality improvement principles.                                                    |
| Byszewski et al., 2017         | Intellectual, Occupational   | Individual                      | Thematic        | Students found the podcast a creative method to present a specialty and suggested creating podcasts for other medical fields; Students provided suggestions for including patient testimonials and "A day in the life of..."                                                                                                                                                                                                   | A creative podcast is useful to raise awareness of geriatric medicine as a potential career choice among medical students and can be used as a novel multimedia approach for a variety of career options for medical students when considering residency programs. |
| Cadieux et al., 2017           | Intellectual, Occupational   | System                          | Thematic        | Understanding change; Effective teamwork; Leading in patient safety; Leadership in action                                                                                                                                                                                                                                                                                                                                      | Leadership in medical education should be grounded in a healthcare context applicable to the learner's stage of training. Engagement among medical students may be better supported if leadership is framed as a competency throughout their career.               |
| Chew et al., 2012              | Intellectual, Occupational   | Individual                      | Thematic        | Enthusiasm for small group sessions; Clinical observer-ships; Community agency placements; Diversity of topics covered                                                                                                                                                                                                                                                                                                         | Student-run initiatives can supplement medical curriculum content and promote student leadership and interest, community partnerships, and faculty mentorship.                                                                                                     |
| Ellaway et al., 2014           | Social, Intellectual         | System                          | Grounded Theory | Learners use their devices differently, depending on affordances and context; Mobile devices augment but are not replacements for laptop computers; Learners use only some device features and desire more control over device selection; There are learner concerns about the hidden curriculum of mobile device use in medical education; Mobile devices in medical education are perceived as a tool and source of support. | Medical learners use electronic devices as a support tool in medical education depending on the learning culture and contexts of their specific medical programs and education ecologies.                                                                          |
| Law et al., 2019               | Intellectual, Occupational   | Individual                      | Thematic        | Value of the course; Potential application of learning                                                                                                                                                                                                                                                                                                                                                                         | There are linkages between computer science and medicine that would benefit from enhanced two-way communication                                                                                                                                                    |

## Cherak et al., (2020) Tables and Figures

|                                      |                                    |                                       |                  |                                                                                                                                                                                                                                                                                                                                                                         |                                                                                                                                                                                                                                                                                                                             |
|--------------------------------------|------------------------------------|---------------------------------------|------------------|-------------------------------------------------------------------------------------------------------------------------------------------------------------------------------------------------------------------------------------------------------------------------------------------------------------------------------------------------------------------------|-----------------------------------------------------------------------------------------------------------------------------------------------------------------------------------------------------------------------------------------------------------------------------------------------------------------------------|
|                                      |                                    |                                       |                  |                                                                                                                                                                                                                                                                                                                                                                         | between the disciplines when developing technology for use in medicine.                                                                                                                                                                                                                                                     |
| Lynch et al., 2018                   | Social, Intellectual               | Individual                            | Thematic         | Peer Connection; Trust in Data Veracity; Aid to Clinical Learning Process                                                                                                                                                                                                                                                                                               | It is feasible to link students from separate continents in a community of peer-to-peer learning to encourage peer cooperation with potential to disseminate key clinical learning experiences widely.                                                                                                                      |
| Welsher et al., 2018                 | Intellectual                       | Individual                            | Thematic         | Ease of use; Technical knowledge; Versatile and accessible; Observational tools beneficial to learning; Desire for more networked observational learning activity                                                                                                                                                                                                       | Video-based observational learning, facilitated by internet-mediated platforms, is a viable way to support simulation-based clinical skills learning in a distributed group of health professional trainees.                                                                                                                |
| Yeung et al., 2017                   | Social, Intellectual               | Individual                            | Thematic         | A longitudinal SAT program increased perceived knowledge of educational theory and provided students with opportunities to practice teaching; A longitudinal SAT program allowed students to provide and receive feedback, and gave students opportunities to reflect on their practice; A longitudinal SAT program equipped students with improved learning strategies | Early exposure to medical education theories gives students opportunities to apply theories practically through ongoing teaching and feedback sessions, and reflective exercises.                                                                                                                                           |
| <b>Postgraduate Medical Students</b> |                                    |                                       |                  |                                                                                                                                                                                                                                                                                                                                                                         |                                                                                                                                                                                                                                                                                                                             |
| <b>Author, Year</b>                  | <b>Wellness Domain<sup>3</sup></b> | <b>Intervention Level<sup>4</sup></b> | <b>Analysis</b>  | <b>Themes or Theory</b>                                                                                                                                                                                                                                                                                                                                                 | <b>Authors' Conclusions</b>                                                                                                                                                                                                                                                                                                 |
| Campagna-Vaillancourt et al., 2014   | Social                             | Program                               | Thematic         | Meet more staff; Less stressful; Multiple first impressions; Different aspects of personality; Objective and fair; Team assessment                                                                                                                                                                                                                                      | Using the MMI for admission to a residency program has good acceptability among stakeholders, good reliability, and is feasible. Predictive validity should be assessed regarding future performance.                                                                                                                       |
| Malhotra et al., 2008                | Mental, Intellectual               | Program                               | Phenomenological | Education; Assessment; Exam preparation                                                                                                                                                                                                                                                                                                                                 | The mini-Clinical Evaluation Exercise may be anxiety provoking during initial assessment, but over time, may provide insight into clinical competence. Participants believed the mini-Clinical Evaluation Exercise experience would benefit them in preparation and successful completion of their national specialty exam. |
| Myden et al., 2012                   | Intellectual, Occupational         | Program                               | Thematic         | Confidence; Awareness; Deepening knowledge; Changed perspectives                                                                                                                                                                                                                                                                                                        | High-impact educational interventions promoting cognitive flexibility would benefit trainees through increased confidence, changed awareness, and deepening knowledge, as well as changed perspectives.                                                                                                                     |

Cherak et al., (2020) Tables and Figures

|                        |                                    |            |                 |                                                                                                                                                                                                                                                                                                          |                                                                                                                                                                                                                                     |
|------------------------|------------------------------------|------------|-----------------|----------------------------------------------------------------------------------------------------------------------------------------------------------------------------------------------------------------------------------------------------------------------------------------------------------|-------------------------------------------------------------------------------------------------------------------------------------------------------------------------------------------------------------------------------------|
| Sachedina et al., 2019 | Occupational                       | Individual | Thematic        | Skills of code blue learners; Residents feel unprepared to serve as CBLs before the CCU rotation; The CBSP is a useful tool to help prepare residents to serve as CBLs; The authenticity of the CBP cases was useful; Real codes have higher stakes, higher anxiety, and more chaos than simulated codes | The code blue simulation program enhanced resident preparedness to serve as code blue leaders; however, differences remain between simulated and real codes that should be addressed to enhance the fidelity of future simulations. |
| Sukhera et al., 2018   | Mental                             | System     | Grounded Theory | Vulnerability provoked tension between personal and professional identities reconciled through striving for ideal while acknowledging the actual.                                                                                                                                                        | Addressing implicit bias among health professionals is influence by the process of recognizing and managing biases. A self-improvement approach that accepts individual shortcomings may be a useful approach.                      |
| Tait et al., 2013      | Mental, Intellectual, Occupational | Individual | Thematic        | Experience of the interview; Patient as teacher; Residents reflecting on their own lives; Resident reflections on palliative/end-of-life care education; Physician role in conflict                                                                                                                      | Conversations with dying patients and soliciting a patient’s story are poorly taught and modeled in medical education.                                                                                                              |
| Tan et al., 2013       | Social, Occupational               | Program    | Thematic        | Useful content; Beneficial teaching modality; Realism of case; Awkward navigation; Worried about missing key points in the case                                                                                                                                                                          | The online virtual patient case in palliative care is a teaching tool helpful to address the need for increased formal palliative care experience in medical education.                                                             |

<sup>1</sup>Adapted from the Summary of Qualitative Findings Table structure proposed by Lewin et al., 2018

<sup>2</sup>Categorized by medical learner population then alphabetically by author

<sup>3</sup>Social, mental, physical, intellectual and/or occupational wellness [Supplemental Table 3]

<sup>4</sup>Individual, program or system level [Supplemental Table 3]

**Table 4.** Summarized findings on wellness domains with regard to medical learner population and level of intervention

| Medical Learner Population<br><i>Level of Intervention</i> <sup>2</sup> |                                         | Wellness Domains <sup>1</sup> |                       |                       |                         |                         |
|-------------------------------------------------------------------------|-----------------------------------------|-------------------------------|-----------------------|-----------------------|-------------------------|-------------------------|
|                                                                         |                                         | Social                        | Mental                | Physical              | Intellectual            | Occupational            |
|                                                                         |                                         | N=17 (26%) <sup>3</sup>       | N=6 (9%) <sup>3</sup> | N=1 (2%) <sup>3</sup> | N=51 (78%) <sup>3</sup> | N=32 (49%) <sup>3</sup> |
| <b>Undergraduate Non-Medical</b>                                        | <b>N=2</b><br><b>(3%)<sup>3</sup></b>   | 0                             | 0                     | 0                     | 2                       | 2                       |
| <i>Individual</i>                                                       |                                         | ↑ 0 ↓ 0 ‡ 0                   | ↑ 0 ↓ 0 ‡ 0           | ↑ 0 ↓ 0 ‡ 0           | ↑ 0 ↓ 0 ‡ 0             | ↑ 0 ↓ 0 ‡ 0             |
| <i>Program</i>                                                          |                                         | ↑ 0 ↓ 0 ‡ 0                   | ↑ 0 ↓ 0 ‡ 0           | ↑ 0 ↓ 0 ‡ 0           | ↑ 0 ↓ 0 ‡ 0             | ↑ 0 ↓ 0 ‡ 0             |
| <i>System</i>                                                           |                                         | ↑ 0 ↓ 0 ‡ 0                   | ↑ 0 ↓ 0 ‡ 0           | ↑ 0 ↓ 0 ‡ 0           | ↑ 1 ↓ 1 ‡ 0             | ↑ 1 ↓ 1 ‡ 0             |
| <b>Undergraduate Medical</b>                                            | <b>N=32</b><br><b>(49%)<sup>3</sup></b> | 10                            | 0                     | 0                     | 26                      | 17                      |
| <i>Individual</i>                                                       |                                         | ↑ 2 ↓ 0 ‡ 1                   | ↑ 0 ↓ 0 ‡ 0           | ↑ 0 ↓ 0 ‡ 0           | ↑ 6 ↓ 1 ‡ 2             | ↑ 6 ↓ 0 ‡ 2             |
| <i>Program</i>                                                          |                                         | ↑ 2 ↓ 1 ‡ 0                   | ↑ 0 ↓ 0 ‡ 0           | ↑ 0 ↓ 0 ‡ 0           | ↑ 6 ↓ 1 ‡ 2             | ↑ 3 ↓ 0 ‡ 1             |
| <i>System</i>                                                           |                                         | ↑ 2 ↓ 1 ‡ 1                   | ↑ 0 ↓ 0 ‡ 0           | ↑ 0 ↓ 0 ‡ 0           | ↑ 5 ↓ 1 ‡ 2             | ↑ 3 ↓ 0 ‡ 1             |
| <b>Postgraduate Medical</b>                                             | <b>N=29</b><br><b>(45%)<sup>3</sup></b> | 7                             | 6                     | 1                     | 21                      | 12                      |
| <i>Individual</i>                                                       |                                         | ↑ 0 ↓ 0 ‡ 0                   | ↑ 0 ↓ 1 ‡ 1           | ↑ 0 ↓ 0 ‡ 0           | ↑ 1 ↓ 2 ‡ 1             | ↑ 1 ↓ 0 ‡ 2             |
| <i>Program</i>                                                          |                                         | ↑ 3 ↓ 2 ‡ 1                   | ↑ 1 ↓ 1 ‡ 1           | ↑ 0 ↓ 0 ‡ 0           | ↑ 11 ↓ 0 ‡ 2            | ↑ 4 ↓ 1 ‡ 0             |
| <i>System</i>                                                           |                                         | ↑ 0 ↓ 0 ‡ 1                   | ↑ 0 ↓ 0 ‡ 1           | ↑ 1 ↓ 0 ‡ 0           | ↑ 1 ↓ 2 ‡ 1             | ↑ 3 ↓ 1 ‡ 0             |
| <b>Undergraduate Medical &amp; Postgraduate Medical</b>                 | <b>N=2</b><br><b>(3%)<sup>3</sup></b>   | 0                             | 0                     | 0                     | 2                       | 1                       |
| <i>Individual</i>                                                       |                                         | ↑ 0 ↓ 0 ‡ 0                   | ↑ 0 ↓ 0 ‡ 0           | ↑ 0 ↓ 0 ‡ 0           | ↑ 0 ↓ 0 ‡ 0             | ↑ 0 ↓ 0 ‡ 0             |
| <i>Program</i>                                                          |                                         | ↑ 0 ↓ 0 ‡ 0                   | ↑ 0 ↓ 0 ‡ 0           | ↑ 0 ↓ 0 ‡ 0           | ↑ 0 ↓ 0 ‡ 0             | ↑ 0 ↓ 0 ‡ 0             |
| <i>System</i>                                                           |                                         | ↑ 0 ↓ 0 ‡ 0                   | ↑ 0 ↓ 0 ‡ 0           | ↑ 0 ↓ 0 ‡ 0           | ↑ 1 ↓ 0 ‡ 1             | ↑ 1 ↓ 0 ‡ 0             |

<sup>1</sup>More than one wellness domain could be recorded from a single study

<sup>2</sup>One level of intervention was recorded from each included study

<sup>3</sup>N, number of studies that reported each objective or outcome category; %, N as a proportion of total included studies

↑, statistically significant; ↓, not statistically significant; ‡, statistical significance not assessed; Shading indicates majority statistically significant  
Studies with qualitative outcomes only findings included under statistical significance not assessed

Indeterminate studies with statistically significant results showed statistically significant positive results and indeterminate results not significant

Figure 1. PRISMA diagram

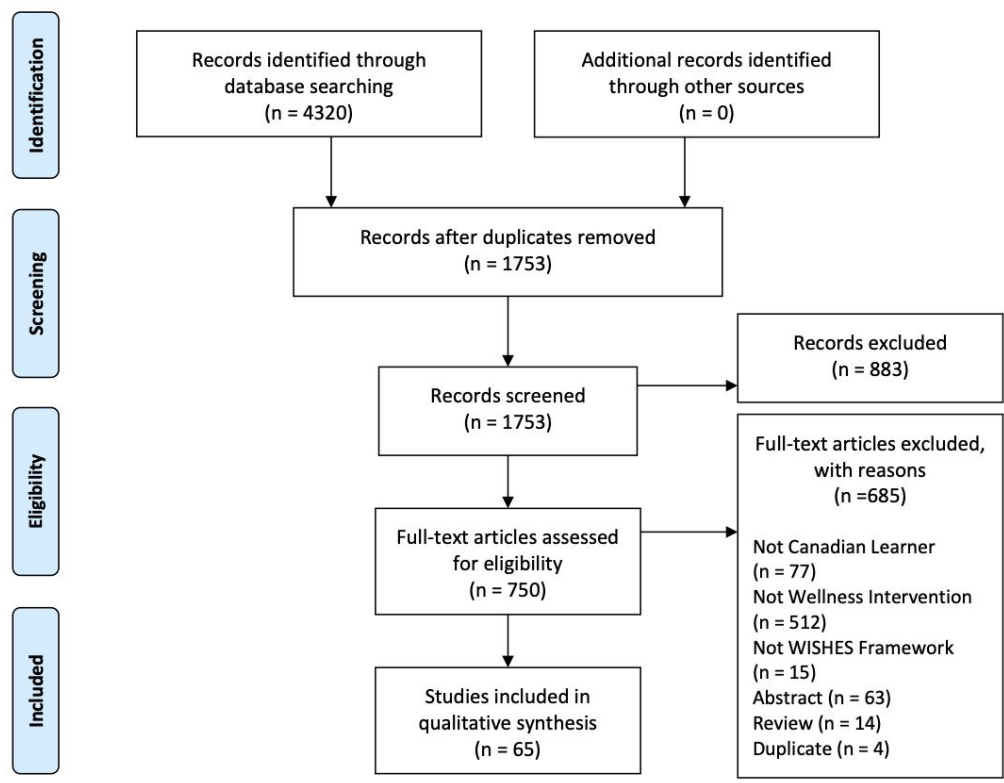



**Supplemental Table 1.** Categorization of wellness domains and intervention levels

| Wellness Domain <sup>1</sup>  | Description                                                                                                                                                                                                                                                                                                                                                                                                             | Examples                                                                                      |
|-------------------------------|-------------------------------------------------------------------------------------------------------------------------------------------------------------------------------------------------------------------------------------------------------------------------------------------------------------------------------------------------------------------------------------------------------------------------|-----------------------------------------------------------------------------------------------|
| Social                        | State of well-being in which individuals and communities feel they understand, are a part of, and are accepted by their social environment, and are comfortable expressing their feelings, needs, identities and opinions<br><i>Including processes [methods] and outcomes [experiences] of social wellness</i>                                                                                                         | Isolation, equity, diversity, discrimination, race, religion, ethnicity, family support       |
| Mental                        | State of well-being in which every individual realizes his or her own potential, can cope with the normal stresses of life, can work productively and fruitfully, and is able to make a contribution to her or his community                                                                                                                                                                                            | Mindfulness, mental health, mental illness or disorder, anger, sadness, emotions              |
| Physical                      | Perception and expectation of well-being of an individuals' body, including the active and continuous effort to maintain optimum levels of physical activity and focus on nutrition, as well as self-care and maintenance of a healthy lifestyle<br><i>Acknowledging physical health and limitations can co-exist in a healthy environment</i>                                                                          | Exercise, physical activity, physical health, nutrition, symptoms of burnout                  |
| Intellectual                  | State of well-being in which individuals are enabled to pursue creative, mentally-stimulating activities that expand their knowledge, develop skills, and foster life-long learning and teaching, towards a goal of self-actualization<br><i>Including processes [how] and outcomes [deliverables] of intellectual wellness</i>                                                                                         | Learning, tools, outcomes, teaching, goals, learning needs                                    |
| Occupational                  | Protection and promotion of workers/learners by preventing and controlling occupational diseases and accidents, and by elimination of conditions hazardous to health and safety at work/school, and the development and promotion of healthy and safe work/learning, work learning environments and organizations<br><i>Including processes [responsibilities] and outcomes [trajectories] of occupational wellness</i> | Work, (resident) rotation, job, lab, research (assistantship or similar)                      |
| Impactful factor <sup>2</sup> | Description                                                                                                                                                                                                                                                                                                                                                                                                             | Examples                                                                                      |
| Individual                    | The individual learner or group of individual learners undefined by program                                                                                                                                                                                                                                                                                                                                             | Persons                                                                                       |
| Program                       | The type of program the learner is enrolled in                                                                                                                                                                                                                                                                                                                                                                          | Undergraduate Medical or Health Sciences, Graduate Medical or Post-Graduate Medical Education |
| System                        | The academic institution or system the learner is housed within                                                                                                                                                                                                                                                                                                                                                         | University, Medical School, Royal College of Physicians and Surgeons of Canada                |

<sup>1</sup>Domains of wellness described within an overall feeling of well-being (i.e., feeling balanced or good generally)

**Supplemental Table 2.** Preferred Reporting Items for Systematic review and Meta-Analyses extension for Scoping Reviews (PRISMA-ScR)

| SECTION                                               | ITEM | PRISMA-ScR CHECKLIST ITEM                                                                                                                                                                                                                                                                                  | PAGE #     |
|-------------------------------------------------------|------|------------------------------------------------------------------------------------------------------------------------------------------------------------------------------------------------------------------------------------------------------------------------------------------------------------|------------|
| <b>TITLE</b>                                          |      |                                                                                                                                                                                                                                                                                                            |            |
| Title                                                 | 1    | Identify the report as a scoping review.                                                                                                                                                                                                                                                                   | 1          |
| <b>ABSTRACT</b>                                       |      |                                                                                                                                                                                                                                                                                                            |            |
| Structured summary                                    | 2    | Provide a structured summary that includes (as applicable): background, objectives, eligibility criteria, sources of evidence, charting methods, results, and conclusions that relate to the review questions and objectives.                                                                              | 3          |
| <b>INTRODUCTION</b>                                   |      |                                                                                                                                                                                                                                                                                                            |            |
| Rationale                                             | 3    | Describe the rationale for the review in the context of what is already known. Explain why the review questions/objectives lend themselves to a scoping review approach.                                                                                                                                   | 5          |
| Objectives                                            | 4    | Provide an explicit statement of the questions and objectives being addressed with reference to their key elements (e.g., population or participants, concepts, and context) or other relevant key elements used to conceptualize the review questions and/or objectives.                                  | 5          |
| <b>METHODS</b>                                        |      |                                                                                                                                                                                                                                                                                                            |            |
| Protocol and registration                             | 5    | Indicate whether a review protocol exists; state if and where it can be accessed (e.g., a Web address); and if available, provide registration information, including the registration number.                                                                                                             | 6          |
| Eligibility criteria                                  | 6    | Specify characteristics of the sources of evidence used as eligibility criteria (e.g., years considered, language, and publication status), and provide a rationale.                                                                                                                                       | 6          |
| Information sources*                                  | 7    | Describe all information sources in the search (e.g., databases with dates of coverage and contact with authors to identify additional sources), as well as the date the most recent search was executed.                                                                                                  | 7          |
| Search                                                | 8    | Present the full electronic search strategy for at least 1 database, including any limits used, such that it could be repeated.                                                                                                                                                                            | S. Table 2 |
| Selection of sources of evidence†                     | 9    | State the process for selecting sources of evidence (i.e., screening and eligibility) included in the scoping review.                                                                                                                                                                                      | 7          |
| Data charting process‡                                | 10   | Describe the methods of charting data from the included sources of evidence (e.g., calibrated forms or forms that have been tested by the team before their use, and whether data charting was done independently or in duplicate) and any processes for obtaining and confirming data from investigators. | 7          |
| Data items                                            | 11   | List and define all variables for which data were sought and any assumptions and simplifications made.                                                                                                                                                                                                     | 8          |
| Critical appraisal of individual sources of evidence§ | 12   | If done, provide a rationale for conducting a critical appraisal of included sources of evidence; describe the methods used and how this information was used in any data synthesis (if appropriate).                                                                                                      | N/A        |

## Cherak et al., (2020) Tables and Figures

| SECTION                                       | ITEM | PRISMA-ScR CHECKLIST ITEM                                                                                                                                                                       | PAGE #                   |
|-----------------------------------------------|------|-------------------------------------------------------------------------------------------------------------------------------------------------------------------------------------------------|--------------------------|
| Synthesis of results                          | 13   | Describe the methods of handling and summarizing the data that were charted.                                                                                                                    | 8                        |
| <b>RESULTS</b>                                |      |                                                                                                                                                                                                 |                          |
| Selection of sources of evidence              | 14   | Give numbers of sources of evidence screened, assessed for eligibility, and included in the review, with reasons for exclusions at each stage, ideally using a flow diagram.                    | 9<br>Figure 1            |
| Characteristics of sources of evidence        | 15   | For each source of evidence, present characteristics for which data were charted and provide the citations.                                                                                     | 9<br>Table 1             |
| Critical appraisal within sources of evidence | 16   | If done, present data on critical appraisal of included sources of evidence (see item 12).                                                                                                      | N/A                      |
| Results of individual sources of evidence     | 17   | For each included source of evidence, present the relevant data that were charted that relate to the review questions and objectives.                                                           | 10<br>Table 2<br>Table 3 |
| Synthesis of results                          | 18   | Summarize and/or present the charting results as they relate to the review questions and objectives.                                                                                            | 11<br>Table 4            |
| <b>DISCUSSION</b>                             |      |                                                                                                                                                                                                 |                          |
| Summary of evidence                           | 19   | Summarize the main results (including an overview of concepts, themes, and types of evidence available), link to the review questions and objectives, and consider the relevance to key groups. | 12-18                    |
| Limitations                                   | 20   | Discuss the limitations of the scoping review process.                                                                                                                                          | 19                       |
| Conclusions                                   | 21   | Provide a general interpretation of the results with respect to the review questions and objectives, as well as potential implications and/or next steps.                                       | 19                       |
| <b>FUNDING</b>                                |      |                                                                                                                                                                                                 |                          |
| Funding                                       | 22   | Describe sources of funding for the included sources of evidence, as well as sources of funding for the scoping review. Describe the role of the funders of the scoping review.                 | 20                       |

JBIG = Joanna Briggs Institute; PRISMA-ScR = Preferred Reporting Items for Systematic reviews and Meta-Analyses extension for Scoping Reviews.

\* Where *sources of evidence* (see second footnote) are compiled from, such as bibliographic databases, social media platforms, and Web sites.

† A more inclusive/heterogeneous term used to account for the different types of evidence or data sources (e.g., quantitative and/or qualitative research, expert opinion, and policy documents) that may be eligible in a scoping review as opposed to only studies. This is not to be confused with *information sources* (see first footnote).

‡ The frameworks by Arksey and O'Malley (6) and Levac and colleagues (7) and the JBI guidance (4, 5) refer to the process of data extraction in a scoping review as data charting.

§ The process of systematically examining research evidence to assess its validity, results, and relevance before using it to inform a decision. This term is used for items 12 and 19 instead of "risk of bias" (which is more applicable to systematic reviews of interventions) to include and acknowledge the various sources of evidence that may be used in a scoping review (e.g., quantitative and/or qualitative research, expert opinion, and policy document).

From: Tricco AC, Lillie E, Zarin W, O'Brien KK, Colquhoun H, Levac D, et al. PRISMA Extension for Scoping Reviews (PRISMA-ScR): Checklist and Explanation. *Ann Intern Med.* ;169:467–473. doi: 10.7326/M18-0850

**Supplemental Table 3.** OVID Medline search strategy

| Population                                                                  | Outcomes                                                                                                                                                                                                                                                                                                                                                                               | Interventions                                                                                                        | Combination and Limiters <sup>3</sup>                                                                                                                                                                                                                                                                                                                                                                                                                                                                                                                                                                                                                                                                                                           |
|-----------------------------------------------------------------------------|----------------------------------------------------------------------------------------------------------------------------------------------------------------------------------------------------------------------------------------------------------------------------------------------------------------------------------------------------------------------------------------|----------------------------------------------------------------------------------------------------------------------|-------------------------------------------------------------------------------------------------------------------------------------------------------------------------------------------------------------------------------------------------------------------------------------------------------------------------------------------------------------------------------------------------------------------------------------------------------------------------------------------------------------------------------------------------------------------------------------------------------------------------------------------------------------------------------------------------------------------------------------------------|
| <i>Canadian Medical Learner<sup>1</sup></i>                                 | <i>Wellness Domains<sup>2</sup></i>                                                                                                                                                                                                                                                                                                                                                    | <i>Wellness Interventions</i>                                                                                        |                                                                                                                                                                                                                                                                                                                                                                                                                                                                                                                                                                                                                                                                                                                                                 |
| 1. exp Education, Medical/ or exp School, Medical/ or exp Faculty, Medical/ | 5. (mental or physical or social or intellectual or occupational or mental health or mental disorder or physical health or physical disorder or occupational health or occupational disorder or social health or social disorder or intellectual health or intellectual disorder or health or quality of life or health related quality of life or health-related quality of life).tw. | 15. exp "Surveys and Questionnaires"/                                                                                | 20. or/1-4                                                                                                                                                                                                                                                                                                                                                                                                                                                                                                                                                                                                                                                                                                                                      |
| 2. exp Education, Medical, Undergraduate/ or exp "Internship or Residency"/ | 6. exp Emotions/ or exp Stress, Psychological/                                                                                                                                                                                                                                                                                                                                         | 16. interview/ or interviews/                                                                                        | 21. or/5-14                                                                                                                                                                                                                                                                                                                                                                                                                                                                                                                                                                                                                                                                                                                                     |
| 3. exp Education, Medical, Graduate/                                        | 7. (emotion or affect or mood or anxiety or anxious or fear or frustration or happiness or happy or sad or lonely or loneliness or pleasure or hate or anger or guilt or shame or hope or hostility or jealousy or satisfaction or cope).tw.                                                                                                                                           | 17. Interview, Psychological/                                                                                        | 22. or/15-19                                                                                                                                                                                                                                                                                                                                                                                                                                                                                                                                                                                                                                                                                                                                    |
| 4. (medical adj (student\$ or undergrad\$ or resident\$)).tw.               | 8. culture.mp. or culture.tw. or cultural.tw. or individual.tw. or individuals.tw. or system.tw. or systems.tw. or systematic.tw. or program.tw. or programs.tw. or programmatic.tw.                                                                                                                                                                                                   | 18. feedback/ or response/ or responses/                                                                             | 23. and/20-22                                                                                                                                                                                                                                                                                                                                                                                                                                                                                                                                                                                                                                                                                                                                   |
|                                                                             | 9. (burnout or distress or stress or stressed or wellness or well-being or wellbeing or depressed or depression or suicide).tw.                                                                                                                                                                                                                                                        | 19. ((program or training or course or curriculum or initiative) adj2 (evaluate or feedback or view or opinion)).tw. | 24. limit 23 to english language                                                                                                                                                                                                                                                                                                                                                                                                                                                                                                                                                                                                                                                                                                                |
|                                                                             | 10. (abuse or mistreat or harassment or harass or professional or unprofessional or support or unsupport or humiliation or disparage or ignore or unsafe or safe or harm or personal service or appropriate or inappropriate or respect or disrespect).tw.                                                                                                                             |                                                                                                                      | 25. exp Canada/                                                                                                                                                                                                                                                                                                                                                                                                                                                                                                                                                                                                                                                                                                                                 |
|                                                                             | 11. empathy/                                                                                                                                                                                                                                                                                                                                                                           |                                                                                                                      | 26. (canada or canadian).tw.                                                                                                                                                                                                                                                                                                                                                                                                                                                                                                                                                                                                                                                                                                                    |
|                                                                             | 12. (empathy or compassion or collegial or resilient or resilience or cooperation or collaboration or kind or kindness or integrity).tw.                                                                                                                                                                                                                                               |                                                                                                                      | 27. 25 or 26                                                                                                                                                                                                                                                                                                                                                                                                                                                                                                                                                                                                                                                                                                                                    |
|                                                                             | 13. exp prejudice/                                                                                                                                                                                                                                                                                                                                                                     |                                                                                                                      | 28. 24 and 27                                                                                                                                                                                                                                                                                                                                                                                                                                                                                                                                                                                                                                                                                                                                   |
|                                                                             | 14. (discriminate or discrimination or sexism or sexist or sexual or racism or race or ethnic or bias).tw.                                                                                                                                                                                                                                                                             |                                                                                                                      | 29. (Canada* or Canadi* or Alberta* or Calgary* or Edmonton* or "British Columbia*" or Vancouver* or Victoria* or Manitoba* or Winnipeg* or "New Brunswick*" or Fredericton* or Moncton* or Newfoundland* or "New Foundland*" or Labrador* or "St John*" or "Saint John*" or "Northwest Territor*" or Yellowknife* or "Nova Scotia*" or Halifax* or Dalhousie* or Nunavut* or Igaluit* or Ontario* or Ontarian* or Toronto* or Ottawa* or Hamilton or Queen's or McMaster* or Kingston* or Sudbury* or "Prince Edward Island*" or Charlottetown* or Quebec* or Montreal* or McGill* or Laval* or Sherbrooke* or Nunavik* or Kuujuaq* or Inukjuak* or Puvirnituk* or Saskatchewan* or Saskatoon* or Yukon* or Whitehorse*).ti,ab. or exp Canada/ |
|                                                                             |                                                                                                                                                                                                                                                                                                                                                                                        |                                                                                                                      | 30. 28 and 29                                                                                                                                                                                                                                                                                                                                                                                                                                                                                                                                                                                                                                                                                                                                   |

<sup>1</sup>A medical learner defined as a learner (i.e., undergraduate non-medical [health sciences or similar] student, graduate science [MSc or PhD] student, undergraduate medical student or postgraduate medical student [resident physician]) registered in an institution whose program pertains to research or treatment of diseases and injuries relating to medicine

<sup>2</sup>Social, mental, physical, intellectual and/or occupational wellness

<sup>3</sup>Population, outcomes and intervention terms were combined within-group with the Boolean operator OR and then population terms yield was combined between-group with the intervention, and outcome terms yields using the Boolean operator AND

Cherak et al., (2020) Tables and Figures

### References for studies included in the review

1. Dumont SB, N.;Morin, D.;Houle, N.;Iloko-Fundi, M. Implementing an interfaculty series of courses on interprofessional collaboration in prelicensure health science curriculums. *Education for health (Abingdon, England)*. 2010;23:395.
2. Roach VAB, Michael G.;Moore, Corey C.;Wilson, Timothy D. Is three-dimensional videography the cutting edge of surgical skill acquisition? *Anatomical sciences education*. 2012;5:138-45.
3. Ali J. The Trauma Evaluation and Management (TEAM) teaching module: its role for senior medical students in Canada. *Canadian journal of surgery. Journal canadien de chirurgie*. 2003;46:99-102.
4. Bland EO, L.;Brisson-Carroll, G.;Morel, C.;Holmes, P.;Gruslin, A. Influence of an educational program on medical students' attitudes to substance use disorders in pregnancy. *The American journal of drug and alcohol abuse*. 2001;27:483-90.
5. Brown AN, A.;Stanhope, A.;Koh, J.;Greenway, M.;Grierson, L. Can first-year medical students acquire quality improvement knowledge prior to substantial clinical exposure? A mixed-methods evaluation of a pre-clerkship curriculum that uses education as the context for learning. *BMJ Quality and Safety*. 2018;27:576-82.
6. Burbidge BK, Neil;Malin, Greg;Trinder, Krista;Pinelle, David. University of Saskatchewan Radiology Courseware (USRC): an assessment of its utility for teaching diagnostic imaging in the medical school curriculum. *Teaching and learning in medicine*. 2015;27:91-8.

## Cherak et al., (2020) Tables and Figures

- 1  
2  
3 7. Byszewski AB, Kathryn;Latrous, Meriem. What Kind of Doctor Do You Want to Be?  
4 Geriatric Medicine Podcast as a Career Planning Resource. *BioMed research*  
5  
6  
7  
8  
9  
10  
11 8. Cadieux DCL, Lorelei;Kwiatkowski, Daniela;Van Deven, Teresa;Bryant,  
12 Murray;Tithecott, Gary. Challenges in Translation: Lessons from Using Business  
13  
14  
15  
16  
17  
18  
19  
20 9. Cassidy-Smith TNHk, J.;Nyce, A. L.;Chansky, M. E.;Baumann, B. M. Impact of a  
21  
22  
23  
24  
25  
26  
27 10. Chew DJ, Denise;Thorne, Julie;Ho, Meghan;Andany, Nisha;Morin, Carly;Hoffman,  
28  
29  
30  
31  
32  
33  
34  
35  
36 11. Cleave-Hogg DM, Pamela J. Experiential learning in an anaesthesia simulation centre:  
37  
38  
39  
40  
41  
42  
43  
44  
45  
46  
47  
48 12. D'Urzo KAF, S. M.;Baillie, C.;Skelding, S.;Dobrowolski, S.;Houlden, R. L.;Tomasone, J.  
49  
50  
51  
52  
53  
54  
55  
56  
57  
58  
59  
60 13. Duque GG, Susan;Bergman, Howard. Early clinical exposure to geriatric medicine in  
second-year medical school students--the McGill experience. *Journal of the American*  
*Geriatrics Society*. 2003;51:544-8.

## Cherak et al., (2020) Tables and Figures

14. Elharram MD, Trish;Lalande, Annie;Ge, Susan;Gao, Sophie;Noel, Geoffroy. Global Health Values of a Multidirectional Near Peer Training Program in Surgery, Pathology, Anatomy, Research Methodology, and Medical Education for Haitian, Rwandan, and Canadian Medical Students. *Annals of global health*. 2017;83:274-80.
15. Ellaway RHF, Patricia;Graves, Lisa;Campbell, Alanna. Left to their own devices: medical learners' use of mobile technologies. *Medical teacher*. 2014;36:130-8.
16. Fairchild A, Watanabe S, Chambers C, Yurick J, Lem L, Tachynski P. Initiation of a multidisciplinary summer studentship in palliative and supportive care in oncology. *J Multidiscip Healthc*. 2012;5:231-9.
17. Garg AB, R.;Kason, Y. Teaching medical students how to break bad news. *CMAJ*. 1997;156:1159-64.
18. Gawad N, Moussa F, Christakis GT, Rutka JT. Planting the 'SEAD': early comprehensive exposure to surgery for medical students. *J Surg Educ*. 2013;70:487-94.
19. Greene BH, Linden;Gawad, Nada;Hamstra, Stanley J.;McLean, Laurie. Surgical exploration and discovery program: inaugural involvement of otolaryngology - head and neck surgery. *Journal of otolaryngology - head & neck surgery = Le Journal d'oto-rhinolaryngologie et de chirurgie cervico-faciale*. 2015;44:3.
20. Harding SRDE, M. F. Using a Lego-based communications simulation to introduce medical students to patient-centered interviewing. *Teaching and learning in medicine*. 2001;13:130-5.
21. Haupt SD, T.;Smyth, M.;Thomas Toguri, J.;Roberts, A.;Raju, K. L.;Bowes, D. MEDICAL STUDENT EXPOSURE TO RADIATION ONCOLOGY THROUGH THE PRE-CLERKSHIP EXPLORATION PROGRAM (PREP): EFFECT ON CAREER

Cherak et al., (2020) Tables and Figures

- 1  
2  
3 INTEREST AND UNDERSTANDING OF RADIATION ONCOLOGY. *Radiotherapy*  
4 *and Oncology*. 2019;139:S33.  
5  
6  
7  
8 22. Ibrahim GM, Hoffart S, Lam RA, Minty EP, Ying MT, Schaefer JP. Think global, act  
9 local: medical students contextualize global health education. *Educ Health (Abingdon)*.  
10 2014;27:55-8.  
11  
12  
13  
14 23. Jamniczky HAC, Darrel;Paget, Michael;Ramji, Qahir;Lenz, Ryan;McLaughlin,  
15 Kevin;Coderre, Sylvain;Ma, Irene W. Y. Cognitive load imposed by ultrasound-  
16 facilitated teaching does not adversely affect gross anatomy learning outcomes.  
17 *Anatomical sciences education*. 2017;10:144-51.  
18  
19  
20  
21  
22 24. Law MV, P.;Campbell, J.;Craig, M.;Mylopoulos, M. Computing for Medicine: Can We  
23 Prepare Medical Students for the Future? *Academic medicine : journal of the Association*  
24 *of American Medical Colleges*. 2019;94:353-7.  
25  
26  
27  
28  
29  
30 25. Livingston MCB, S.;Emery, A. W.;Thomson, T. A.;Vaughan, G. A.;Wong, W.  
31 T.;Youngash, R. N.;Zack, P. S. Six medical students in a community hospital. *Canadian*  
32 *Medical Association journal*. 1973;109:1013-6.  
33  
34  
35  
36  
37 26. Lynch NPC, T.;Lehane, E.;Reardon, M.;Corrigan, M. Transatlantic peer-to-peer learning:  
38 An initial feasibility analysis. *Surgical Innovation*. 2014;21:643-8.  
39  
40  
41  
42 27. Morgan PJC-H, D. A Canadian simulation experience: Faculty and student opinions of a  
43 performance evaluation study. *British Journal of Anaesthesia*. 2000;85:779-81.  
44  
45  
46  
47 28. Shapiro SML, W. J.;Richards-Bentley, C. M. Evaluation of a communication skills  
48 program for first-year medical students at the University of Toronto. *BMC medical*  
49 *education*. 2009;9:11.  
50  
51  
52  
53  
54  
55  
56  
57  
58  
59  
60



Cherak et al., (2020) Tables and Figures

29. Sheppard ES, M.;Dow, T.;Haupt, T. S.;McVeigh, S. The Effect of a 2-Week Pre-clerkship Residency Exploration Program on Specialty Interest and Understanding of Physical Medicine and Rehabilitation. *Archives of Rehabilitation Research and Clinical Translation*. 2020;100035.
30. Skoll MAD, Ruth;Liston, Robert. Fostering harmony in labor and delivery: a nursing preceptorship for clinical clerks. *Obstetrics and gynecology*. 2006;108:157-61.
31. Smyth MT, J. T.;Dow, T.;Haupt, T. S.;Roberts, A.;Raju, K. Medical student exposure to anesthesiology through the Pre-clerkship Residency Exploration Program: impact on career interest and understanding of anesthesiology. *Canadian Journal of Anesthesia*. 2019;66:1126-8.
32. Turner SRW, Jonathan;Poth, Cheryl;Rogers, W. Todd. Preparing students for clerkship: a resident shadowing program. *Academic medicine : journal of the Association of American Medical Colleges*. 2012;87:1288-91.
33. Welsher AR, D.;Khan, Z.;VanderBeek, L.;Kapralos, B.;Grierson, L. E. M. The Application of Observational Practice and Educational Networking in Simulation-Based and Distributed Medical Education Contexts. *Simulation in healthcare : journal of the Society for Simulation in Healthcare*. 2018;13:3-10.
34. Yeung CF, F.;Farr, S.;Law, M.;Albert, L. Development and implementation of a longitudinal students as teachers program: participant satisfaction and implications for medical student teaching and learning. *BMC medical education*. 2017;17:28.
35. Baird RP, Dan;Ganey, Michael;Hansen, Erik;Emil, Sherif. Partnership in fellowship: Comparative analysis of pediatric surgical training and evaluation of a fellow exchange between Canada and Kenya. *Journal of pediatric surgery*. 2016;51:1704-10.

## Cherak et al., (2020) Tables and Figures

- 1  
2  
3  
4  
5  
6  
7  
8  
9  
10  
11  
12  
13  
14  
15  
16  
17  
18  
19  
20  
21  
22  
23  
24  
25  
26  
27  
28  
29  
30  
31  
32  
33  
34  
35  
36  
37  
38  
39  
40  
41  
42  
43  
44  
45  
46  
47  
48  
49  
50  
51  
52  
53  
54  
55  
56  
57  
58  
59  
60
36. Campagna-Vaillancourt MM, John;Razack, Saleem;Nguyen, Lily H. P. Acceptability and reliability of multiple mini interviews for admission to otolaryngology residency. *The Laryngoscope*. 2014;124:91-6.
  37. Crutcher RAT, Karen;Edwards, Alun;Taylor, Kathy;Norton, Peter. Multi-professional education in diabetes. *Medical teacher*. 2004;26:435-43.
  38. Dore KKK, Sharyn;Ladhani, Moyez;Rolfson, Darryl;Kurtz, Doris;Kulasegaram, Kulamakan;Cullimore, Amie J.;Norman, Geoffrey R.;Eva, Kevin W.;Bates, Stephen;Reiter, Harold I. The reliability and acceptability of the Multiple Mini-Interview as a selection instrument for postgraduate admissions. *Academic medicine : journal of the Association of American Medical Colleges*. 2010;85:S60-3.
  39. Downar J, Krizova A, Ghaffar O, Zaretsky A. Neuroimaging week: a novel, engaging, and effective curriculum for teaching neuroimaging to junior psychiatric residents. *Acad Psychiatry*. 2010;34:119-24.
  40. Ens AJ, Katharine;Palmert, Mark R. Development of an Online Learning Module to Improve Pediatric Residents' Confidence and Knowledge of the Pubertal Examination. *The Journal of adolescent health : official publication of the Society for Adolescent Medicine*. 2017;60:292-8.
  41. Fabreau GE, Meghan;Khanna, Suneil;Minty, Evan;Wallace, Jean E.;de Grood, Jill;Lewin, Adriane;Brown, Garielle;Bharwani, Aleem;Gilmour, Janet;Lemaire, Jane B. Shifting perceptions: a pre-post study to assess the impact of a senior resident rotation bundle. *BMC medical education*. 2013;13:115.

## Cherak et al., (2020) Tables and Figures

- 1  
2  
3  
4  
5  
6  
7  
8  
9  
10  
11  
12  
13  
14  
15  
16  
17  
18  
19  
20  
21  
22  
23  
24  
25  
26  
27  
28  
29  
30  
31  
32  
33  
34  
35  
36  
37  
38  
39  
40  
41  
42  
43  
44  
45  
46  
47  
48  
49  
50  
51  
52  
53  
54  
55  
56  
57  
58  
59  
60
42. Finley JPB, M. J.;Boutin, C.;Duncan, W. J.;Dyck, J. D.;Hosking, M. C.;Nykanen, D. A national network for the tele-education of Canadian residents in pediatric cardiology. *Cardiology in the young*. 2001;11:526-31.
43. Gibson JN, Duc;Davidson, Jana;Panagiotopoulos, Constadina. Effectiveness of an educational handbook in improving psychiatry resident knowledge of second-generation antipsychotics. *Academic psychiatry : the journal of the American Association of Directors of Psychiatric Residency Training and the Association for Academic Psychiatry*. 2015;39:154-9.
44. Gilic FS, I.;Blagojevic, A.;Schultz, K. The "Nightmares" course Effective simulation-based acute care training method for family medicine residents. *Canadian Family Physician*. 2015;61:S52.
45. Grabovac AC, N.;McKenna, M. Pilot study and evaluation of postgraduate course on "The interface between spirituality, religion and psychiatry". *Academic Psychiatry*. 2008;32:332-7.
46. Hanna WCM, David S.;Fried, Gerald M.;Elhilali, Mostafa;Khwaja, Kosar A. Training future surgeons for management roles: the resident-surgeon-manager conference. *Archives of surgery (Chicago, Ill. : 1960)*. 2012;147:940-4.
47. James MTM, Marcy J.;McLaughlin, Kevin. Evaluation of a multifaceted "resident-as-teacher" educational intervention to improve morning report. *BMC medical education*. 2006;6:20.
48. Jefferies AS, Vibhuti. Clinicians prefer simple educational tools for implementing practice change. *Medical teacher*. 2011;33:e602-6.

## Cherak et al., (2020) Tables and Figures

- 1  
2  
3 49. Kanagasabai TM, Loreta;McGuire, Joy;Russell, Melanie;Vearncombe, Mary;Urowitz,  
4  
5 Murray. Evidence-based strategies to improve immunization compliance of postgraduate  
6  
7 medical trainees at large academic-medical facilities. *Healthcare quarterly (Toronto,*  
8  
9 *Ont.).* 2007;10:81-6.
- 10  
11  
12 50. Law MR, Mark J.;Seitz, Dallas;Davidson, Marla;Madan, Robert;Wiens, Andrew.  
13  
14 Evaluation of a National Online Educational Program in Geriatric Psychiatry. *Academic*  
15  
16 *psychiatry : the journal of the American Association of Directors of Psychiatric*  
17  
18 *Residency Training and the Association for Academic Psychiatry.* 2016;40:923-7.
- 19  
20  
21 51. Malhotra SH, Rose;Courneya, Carol-Ann. Internal medicine residents' perceptions of the  
22  
23 Mini-Clinical Evaluation Exercise. *Medical teacher.* 2008;30:414-9.
- 24  
25  
26 52. McKendy KMP, N.;Fleischer, D. M.;Vassiliou, M. C. A learner-created virtual patient  
27  
28 curriculum for surgical residents: Successes and failures. *Journal of Surgical Education.*  
29  
30  
31 2016;73:559-66.
- 32  
33 53. McMillan HJW, Hilary;Moreau, Katherine A.;Eady, Kaylee;Sell, Erick;Lobos, Anna-  
34  
35 Theresa;Grabowski, Jenny;Doja, Asif. Lumbar puncture simulation in pediatric residency  
36  
37 training: improving procedural competence and decreasing anxiety. *BMC medical*  
38  
39 *education.* 2016;16:198.
- 40  
41  
42 54. Meterissian SL, Moisha;McLeod, Peter. Games as teaching tools in a surgical residency.  
43  
44 *Medical teacher.* 2007;29:e258-60.
- 45  
46  
47 55. Myden CAA, C.;Kopp, G. D.;Hutchison, C. R. Computer-assisted surgery simulations  
48  
49 and directed practice of total knee arthroplasty: educational benefits to the trainee.  
50  
51 *Computer aided surgery : official journal of the International Society for Computer*  
52  
53 *Aided Surgery.* 2012;17:113-27.
- 54  
55  
56  
57  
58  
59  
60

## Cherak et al., (2020) Tables and Figures

- 1  
2  
3  
4  
5  
6  
7  
8  
9  
10  
11  
12  
13  
14  
15  
16  
17  
18  
19  
20  
21  
22  
23  
24  
25  
26  
27  
28  
29  
30  
31  
32  
33  
34  
35  
36  
37  
38  
39  
40  
41  
42  
43  
44  
45  
46  
47  
48  
49  
50  
51  
52  
53  
54  
55  
56  
57  
58  
59  
60
56. Sachedina AKB, S.;Remtulla, A.;Sridhar, K.;Morrison, D. Preparing the Next Generation of Code Blue Leaders Through Simulation: What's Missing? *Simulation in healthcare : journal of the Society for Simulation in Healthcare*. 2019;14:77-81.
57. Sternszus RS, Yvonne;Bhanji, Farhan;Andonian, Sero;Snell, Linda S. Evaluating a novel resident role-modelling programme. *The clinical teacher*. 2018;15:252-7.
58. Sukhera JW, Michael;Teunissen, Pim W.;Lingard, Lorelei;Watling, Chris. Striving While Accepting: Exploring the Relationship Between Identity and Implicit Bias Recognition and Management. *Academic medicine : journal of the Association of American Medical Colleges*. 2018;93:S82-S8.
59. Tait GRH, Brian D. Residents learning from a narrative experience with dying patients: a qualitative study. *Advances in health sciences education : theory and practice*. 2013;18:727-43.
60. Tan AR, Shelley Paige;Duerksen, Kimberley. Death is not always a failure: outcomes from implementing an online virtual patient clinical case in palliative care for family medicine clerkship. *Medical education online*. 2013;18:22711.
61. Telner DB-B, Maja;Chan, David;Chester, Bob;Marlow, Bernard;Meuser, James;Rothman, Arthur;Harvey, Bart. Game-based versus traditional case-based learning: comparing effectiveness in stroke continuing medical education. *Canadian family physician Medecin de famille canadien*. 2010;56:e345-51.
62. Willett TGK, Michael;Cardinal, Pierre;Karas, Philip. An evaluation of the Acute Critical Events Simulation (ACES) course for family medicine residents. *Canadian journal of rural medicine : the official journal of the Society of Rural Physicians of Canada* =

## Cherak et al., (2020) Tables and Figures

- 1  
2  
3  
4  
5  
6  
7  
8  
9  
10  
11  
12  
13  
14  
15  
16  
17  
18  
19  
20  
21  
22  
23  
24  
25  
26  
27  
28  
29  
30  
31  
32  
33  
34  
35  
36  
37  
38  
39  
40  
41  
42  
43  
44  
45  
46  
47  
48  
49  
50  
51  
52  
53  
54  
55  
56  
57  
58  
59  
60
- Journal canadien de la medecine rurale : le journal officiel de la Societe de medecine rurale du Canada.* 2011;16:89-95.
63. Zahrai AC, Jaskarndip;Stojimirovic, Dan;Schemitsch, Emil H.;Yee, Albert;Kraemer, William. Quality of life and educational benefit among orthopedic surgery residents: a prospective, multicentre comparison of the night float and the standard call systems. *Canadian journal of surgery. Journal canadien de chirurgie.* 2011;54:25-32.
64. Posluns ES, M. S.;Keystone, J. S.;Ennis, J.;Claessons, E. A. Rewarding medical teaching excellence in a major Canadian teaching hospital. *Medical teacher.* 1990;12:13-22.
65. Laidlaw TSM, Heather;Kaufman, David M.;Langille, Donald B.;Sargeant, Joan. Implementing a communication skills programme in medical school: needs assessment and programme change. *Medical education.* 2002;36:115-24.
